# Supplementary material for: Viral RNA switch mediates the dynamic control of flavivirus replicase recruitment by genome cyclization
Source: eLife. 2016 Oct 1;5:e17636. doi: 10.7554/eLife.17636 (PMC5101012; doi:10.7554/eLife.17636)
Supplement: Figure 5—source data 1. — DOI: http://dx.doi.org/10.7554/eLife.17636.015 [file elife-17636-fig5-data1.xlsx]

## Sheet: Figure 5B-C  source data
									log10(vRNA copies per 2 ul sample)
	WT	WT	WT	M1A	M1A	M1A	M1C	M1C	M1C	M3A	M3A	M3A	M3C	M3C	M3C	GVD	GVD	GVD
time post transfection	R1	R2	R3	R1	R2	R3	R1	R2	R3	R1	R2	R3	R1	R2	R3	R1	R2	R3
4 h	7.13207	7.08747	7.06071	7.11423	7.18855	7.19153	7.30153	7.35801	7.29558	7.01909	7.07558	7.07558	7.39964	7.36396	7.33423	6.78422	6.83477	6.57017
48 h	7.80323	7.75235	7.73439	7.26749	7.15974	7.26749	8.06961	7.93193	7.94989	7.01308	6.89336	7.02206	7.37224	7.55781	7.55481	6.88737	6.76765	7.10287
72 h	8.60262	8.55993	8.55993	7.99892	7.94099	7.97452	8.61482	8.51725	8.55688	7.18483	7.09336	7.17874	7.95013	7.91659	7.79768	6.75188	6.73053	6.56894
96 h	8.59641	8.76622	8.7692	8.5279	8.49811	8.61429	8.64706	8.65302	8.62918	7.50312	7.48227	7.55972	8.38788	8.33426	8.46534	6.47239	6.51111	6.57665
									log10(changes of vRNA copies relative to 4 h)
	WT	WT	WT	M1A	M1A	M1A	M1C	M1C	M1C	M3A	M3A	M3A	M3C	M3C	M3C	GVD	GVD	GVD
time post transfection	R1	R2	R3	R1	R2	R3	R1	R2	R3	R1	R2	R3	R1	R2	R3	R1	R2	R3
4 h	0.038649	-0.005946	-0.032703	-0.050541	0.023784	0.026757	-0.016847	0.03964	-0.022793	-0.037658	0.018829	0.018829	0.033694	-0.001982	-0.031712	0.054505	0.105046	-0.159551
48 h	0.709816	0.658935	0.640977	0.102717	-0.005031	0.102717	0.751236	0.613558	0.631516	-0.043669	-0.163389	-0.03469	0.006299	0.191865	0.188872	0.157655	0.037935	0.373151
72 h	1.5092	1.46652	1.46652	0.834148	0.776217	0.809756	1.29644	1.19887	1.23851	0.128084	0.036614	0.121986	0.584191	0.550652	0.431741	0.022156	0.000813	-0.160784
96 h	1.503	1.6728	1.67578	1.36313	1.33334	1.44952	1.32868	1.33464	1.31081	0.446372	0.425519	0.502973	1.02194	0.968321	1.0994	-0.257332	-0.218605	-0.153067

## Sheet: ANOVA
Table Analyzed	Data 1
Two-way ANOVA	Ordinary
Alpha	0.05
Source of Variation	% of total variation	P value	P value summary	Significant?
Interaction	23.95	< 0.0001	****	Yes
Row Factor	39.29	< 0.0001	****	Yes
Column Factor	35.69	< 0.0001	****	Yes
ANOVA table	SS	DF	MS	F (DFn, DFd)	P value
Interaction	5.71	15	0.3807	F (15, 48) = 71.64	P < 0.0001
Row Factor	9.367	3	3.122	F (3, 48) = 587.5	P < 0.0001
Column Factor	8.509	5	1.702	F (5, 48) = 320.2	P < 0.0001
Residual	0.2551	48	0.005314
Number of missing values	0

## Sheet: Multiple comparisons
Within each row	compare columns (simple effects within rows)
Number of families	4
Number of comparisons per family	15
Alpha	0.001
Tukey's multiple comparisons test	Mean Diff.	99.9% CI of diff.	Significant?	Summary	Adjusted P Value
4 h
WT vs. M1A	-9.313e-10	-0.2580 to 0.2580	No	ns	> 0.9999
WT vs. M1C	3.104e-10	-0.2580 to 0.2580	No	ns	> 0.9999
WT vs. M3A	-3.104e-10	-0.2580 to 0.2580	No	ns	> 0.9999
WT vs. M3C	-2.328e-10	-0.2580 to 0.2580	No	ns	> 0.9999
WT vs. GVD	-1.552e-09	-0.2580 to 0.2580	No	ns	> 0.9999
M1A vs. M1C	1.242e-09	-0.2580 to 0.2580	No	ns	> 0.9999
M1A vs. M3A	6.209e-10	-0.2580 to 0.2580	No	ns	> 0.9999
M1A vs. M3C	6.985e-10	-0.2580 to 0.2580	No	ns	> 0.9999
M1A vs. GVD	-6.209e-10	-0.2580 to 0.2580	No	ns	> 0.9999
M1C vs. M3A	-6.209e-10	-0.2580 to 0.2580	No	ns	> 0.9999
M1C vs. M3C	-5.433e-10	-0.2580 to 0.2580	No	ns	> 0.9999
M1C vs. GVD	-1.863e-09	-0.2580 to 0.2580	No	ns	> 0.9999
M3A vs. M3C	7.761e-11	-0.2580 to 0.2580	No	ns	> 0.9999
M3A vs. GVD	-1.242e-09	-0.2580 to 0.2580	No	ns	> 0.9999
M3C vs. GVD	-1.319e-09	-0.2580 to 0.2580	No	ns	> 0.9999
48 h
WT vs. M1A	0.6031	0.3451 to 0.8611	Yes	****	< 0.0001
WT vs. M1C	0.004473	-0.2535 to 0.2624	No	ns	> 0.9999
WT vs. M3A	0.7505	0.4925 to 1.008	Yes	****	< 0.0001
WT vs. M3C	0.5409	0.2829 to 0.7989	Yes	****	< 0.0001
WT vs. GVD	0.4803	0.2224 to 0.7383	Yes	****	< 0.0001
M1A vs. M1C	-0.5986	-0.8566 to -0.3407	Yes	****	< 0.0001
M1A vs. M3A	0.1474	-0.1106 to 0.4054	No	ns	0.1517
M1A vs. M3C	-0.06221	-0.3202 to 0.1958	No	ns	0.9
M1A vs. GVD	-0.1228	-0.3808 to 0.1352	No	ns	0.3237
M1C vs. M3A	0.746	0.4880 to 1.004	Yes	****	< 0.0001
M1C vs. M3C	0.5364	0.2785 to 0.7944	Yes	****	< 0.0001
M1C vs. GVD	0.4759	0.2179 to 0.7338	Yes	****	< 0.0001
M3A vs. M3C	-0.2096	-0.4676 to 0.04838	No	*	0.0116
M3A vs. GVD	-0.2702	-0.5281 to -0.01219	Yes	***	0.0005
M3C vs. GVD	-0.06057	-0.3185 to 0.1974	No	ns	0.9098
72 h
WT vs. M1A	0.674	0.4161 to 0.9320	Yes	****	< 0.0001
WT vs. M1C	0.2361	-0.02184 to 0.4941	No	**	0.0031
WT vs. M3A	1.385	1.127 to 1.643	Yes	****	< 0.0001
WT vs. M3C	0.9586	0.7006 to 1.217	Yes	****	< 0.0001
WT vs. GVD	1.527	1.269 to 1.785	Yes	****	< 0.0001
M1A vs. M1C	-0.4379	-0.6959 to -0.1799	Yes	****	< 0.0001
M1A vs. M3A	0.7111	0.4532 to 0.9691	Yes	****	< 0.0001
M1A vs. M3C	0.2845	0.02654 to 0.5425	Yes	***	0.0002
M1A vs. GVD	0.8526	0.5947 to 1.111	Yes	****	< 0.0001
M1C vs. M3A	1.149	0.8911 to 1.407	Yes	****	< 0.0001
M1C vs. M3C	0.7224	0.4644 to 0.9804	Yes	****	< 0.0001
M1C vs. GVD	1.291	1.033 to 1.549	Yes	****	< 0.0001
M3A vs. M3C	-0.4266	-0.6846 to -0.1687	Yes	****	< 0.0001
M3A vs. GVD	0.1415	-0.1165 to 0.3995	No	ns	0.1848
M3C vs. GVD	0.5681	0.3102 to 0.8261	Yes	****	< 0.0001
96 h
WT vs. M1A	0.2352	-0.02278 to 0.4932	No	**	0.0033
WT vs. M1C	0.2925	0.03451 to 0.5505	Yes	***	0.0002
WT vs. M3A	1.159	0.9009 to 1.417	Yes	****	< 0.0001
WT vs. M3C	0.5873	0.3293 to 0.8453	Yes	****	< 0.0001
WT vs. GVD	1.827	1.569 to 2.085	Yes	****	< 0.0001
M1A vs. M1C	0.05728	-0.2007 to 0.3153	No	ns	0.9275
M1A vs. M3A	0.9237	0.6657 to 1.182	Yes	****	< 0.0001
M1A vs. M3C	0.3521	0.09414 to 0.6101	Yes	****	< 0.0001
M1A vs. GVD	1.592	1.334 to 1.850	Yes	****	< 0.0001
M1C vs. M3A	0.8664	0.6085 to 1.124	Yes	****	< 0.0001
M1C vs. M3C	0.2948	0.03685 to 0.5528	Yes	***	0.0001
M1C vs. GVD	1.534	1.276 to 1.792	Yes	****	< 0.0001
M3A vs. M3C	-0.5716	-0.8296 to -0.3136	Yes	****	< 0.0001
M3A vs. GVD	0.668	0.4100 to 0.9259	Yes	****	< 0.0001
M3C vs. GVD	1.24	0.9816 to 1.498	Yes	****	< 0.0001
Test details	Mean 1	Mean 2	Mean Diff.	SE of diff.	N1	N2	q	DF
4 h
WT vs. M1A	-3.104e-10	6.209e-10	-9.313e-10	0.05952	3	3	2.213e-08	48
WT vs. M1C	-3.104e-10	-6.209e-10	3.104e-10	0.05952	3	3	7.376e-09	48
WT vs. M3A	-3.104e-10	0	-3.104e-10	0.05952	3	3	7.376e-09	48
WT vs. M3C	-3.104e-10	-7.761e-11	-2.328e-10	0.05952	3	3	5.532e-09	48
WT vs. GVD	-3.104e-10	1.242e-09	-1.552e-09	0.05952	3	3	3.688e-08	48
M1A vs. M1C	6.209e-10	-6.209e-10	1.242e-09	0.05952	3	3	2.95e-08	48
M1A vs. M3A	6.209e-10	0	6.209e-10	0.05952	3	3	1.475e-08	48
M1A vs. M3C	6.209e-10	-7.761e-11	6.985e-10	0.05952	3	3	1.66e-08	48
M1A vs. GVD	6.209e-10	1.242e-09	-6.209e-10	0.05952	3	3	1.475e-08	48
M1C vs. M3A	-6.209e-10	0	-6.209e-10	0.05952	3	3	1.475e-08	48
M1C vs. M3C	-6.209e-10	-7.761e-11	-5.433e-10	0.05952	3	3	1.291e-08	48
M1C vs. GVD	-6.209e-10	1.242e-09	-1.863e-09	0.05952	3	3	4.426e-08	48
M3A vs. M3C	0	-7.761e-11	7.761e-11	0.05952	3	3	1.844e-09	48
M3A vs. GVD	0	1.242e-09	-1.242e-09	0.05952	3	3	2.95e-08	48
M3C vs. GVD	-7.761e-11	1.242e-09	-1.319e-09	0.05952	3	3	3.135e-08	48
48 h
WT vs. M1A	0.6699	0.0668	0.6031	0.05952	3	3	14.33	48
WT vs. M1C	0.6699	0.6654	0.004473	0.05952	3	3	0.1063	48
WT vs. M3A	0.6699	-0.08058	0.7505	0.05952	3	3	17.83	48
WT vs. M3C	0.6699	0.129	0.5409	0.05952	3	3	12.85	48
WT vs. GVD	0.6699	0.1896	0.4803	0.05952	3	3	11.41	48
M1A vs. M1C	0.0668	0.6654	-0.5986	0.05952	3	3	14.22	48
M1A vs. M3A	0.0668	-0.08058	0.1474	0.05952	3	3	3.502	48
M1A vs. M3C	0.0668	0.129	-0.06221	0.05952	3	3	1.478	48
M1A vs. GVD	0.0668	0.1896	-0.1228	0.05952	3	3	2.917	48
M1C vs. M3A	0.6654	-0.08058	0.746	0.05952	3	3	17.73	48
M1C vs. M3C	0.6654	0.129	0.5364	0.05952	3	3	12.75	48
M1C vs. GVD	0.6654	0.1896	0.4759	0.05952	3	3	11.31	48
M3A vs. M3C	-0.08058	0.129	-0.2096	0.05952	3	3	4.98	48
M3A vs. GVD	-0.08058	0.1896	-0.2702	0.05952	3	3	6.419	48
M3C vs. GVD	0.129	0.1896	-0.06057	0.05952	3	3	1.439	48
72 h
WT vs. M1A	1.481	0.8067	0.674	0.05952	3	3	16.02	48
WT vs. M1C	1.481	1.245	0.2361	0.05952	3	3	5.611	48
WT vs. M3A	1.481	0.09556	1.385	0.05952	3	3	32.91	48
WT vs. M3C	1.481	0.5222	0.9586	0.05952	3	3	22.78	48
WT vs. GVD	1.481	-0.04594	1.527	0.05952	3	3	36.27	48
M1A vs. M1C	0.8067	1.245	-0.4379	0.05952	3	3	10.4	48
M1A vs. M3A	0.8067	0.09556	0.7111	0.05952	3	3	16.9	48
M1A vs. M3C	0.8067	0.5222	0.2845	0.05952	3	3	6.76	48
M1A vs. GVD	0.8067	-0.04594	0.8526	0.05952	3	3	20.26	48
M1C vs. M3A	1.245	0.09556	1.149	0.05952	3	3	27.3	48
M1C vs. M3C	1.245	0.5222	0.7224	0.05952	3	3	17.16	48
M1C vs. GVD	1.245	-0.04594	1.291	0.05952	3	3	30.66	48
M3A vs. M3C	0.09556	0.5222	-0.4266	0.05952	3	3	10.14	48
M3A vs. GVD	0.09556	-0.04594	0.1415	0.05952	3	3	3.362	48
M3C vs. GVD	0.5222	-0.04594	0.5681	0.05952	3	3	13.5	48
96 h
WT vs. M1A	1.617	1.382	0.2352	0.05952	3	3	5.588	48
WT vs. M1C	1.617	1.325	0.2925	0.05952	3	3	6.949	48
WT vs. M3A	1.617	0.4583	1.159	0.05952	3	3	27.54	48
WT vs. M3C	1.617	1.03	0.5873	0.05952	3	3	13.95	48
WT vs. GVD	1.617	-0.2097	1.827	0.05952	3	3	43.41	48
M1A vs. M1C	1.382	1.325	0.05728	0.05952	3	3	1.361	48
M1A vs. M3A	1.382	0.4583	0.9237	0.05952	3	3	21.95	48
M1A vs. M3C	1.382	1.03	0.3521	0.05952	3	3	8.366	48
M1A vs. GVD	1.382	-0.2097	1.592	0.05952	3	3	37.82	48
M1C vs. M3A	1.325	0.4583	0.8664	0.05952	3	3	20.59	48
M1C vs. M3C	1.325	1.03	0.2948	0.05952	3	3	7.005	48
M1C vs. GVD	1.325	-0.2097	1.534	0.05952	3	3	36.46	48
M3A vs. M3C	0.4583	1.03	-0.5716	0.05952	3	3	13.58	48
M3A vs. GVD	0.4583	-0.2097	0.668	0.05952	3	3	15.87	48
M3C vs. GVD	1.03	-0.2097	1.24	0.05952	3	3	29.45	48
