# Supplementary material for: Viral RNA switch mediates the dynamic control of flavivirus replicase recruitment by genome cyclization
Source: eLife. 2016 Oct 1;5:e17636. doi: 10.7554/eLife.17636 (PMC5101012; doi:10.7554/eLife.17636)
Supplement: Figure 5—source data 2. — DOI: http://dx.doi.org/10.7554/eLife.17636.016 [file elife-17636-fig5-data2.xlsx]

## Sheet: Figure 5D  source data
						log10(vRNA copies per 2 ul sample)
	WT	WT	WT	M5A	M5A	M5A	M5C	M5C	M5C	GVD	GVD	GVD
	R1	R2	R3	R1	R2	R3	R1	R2	R3	R1	R2	R3
4 h	6.77323	6.67799	6.32879	6.71551	6.42691	6.55967	6.81075	6.74437	6.71262	6.68376	6.35765	6.6145
48 h	7.06581	7.02916	6.87946	6.33261	6.17375	6.12793	7.00166	7.02304	7.01082	6.46398	6.58618	6.55869
72 h	7.8354	7.69366	7.86789	6.57152	6.56857	6.45635	7.49286	7.30091	7.4397		6.1079	6.03407
96 h	7.98196	8.1697	8.10611	6.94336	6.83435	6.86463	8.10006	7.9638	8.07583	6.26206	6.21058	6.34684
						log10(changes of vRNA copies relative to 4 h)
	WT	WT	WT	M5A	M5A	M5A	M5C	M5C	M5C	GVD	GVD	GVD
	R1	R2	R3	R1	R2	R3	R1	R2	R3	R1	R2	R3
4 h	0.179894	0.084656	-0.26455	0.148148	-0.140452	-0.007696	0.054834	-0.011544	-0.04329	0.131794	-0.194324	0.06253
48 h	0.472479	0.435819	0.286124	-0.234747	-0.393607	-0.439432	0.245746	0.267131	0.254911	-0.08799	0.03421	0.006715
72 h	1.24207	1.10032	1.27455	0.004157	0.001204	-0.11101	0.736941	0.544996	0.683787		-0.444072	-0.517897
96 h	1.38863	1.57636	1.51278	0.375998	0.26699	0.29727	1.34414	1.20788	1.31992	-0.28991	-0.341386	-0.205126

## Sheet: ANOVA
Table Analyzed	Figure 5D
Two-way ANOVA	Ordinary
Alpha	0.05
Source of Variation	% of total variation	P value	P value summary	Significant?
Interaction	28.83	< 0.0001	****	Yes
Row Factor	23.36	< 0.0001	****	Yes
Column Factor	46.4	< 0.0001	****	Yes
ANOVA table	SS	DF	MS	F (DFn, DFd)	P value
Interaction	4.52	9	0.5022	F (9, 31) = 43.35	P < 0.0001
Row Factor	3.662	3	1.221	F (3, 31) = 105.4	P < 0.0001
Column Factor	7.272	3	2.424	F (3, 31) = 209.3	P < 0.0001
Residual	0.3591	31	0.01158
Number of missing values	1

## Sheet: Multiple comparisons
Within each row	compare columns (simple effects within rows)
Number of families	4
Number of comparisons per family	6
Alpha	0.001
Tukey's multiple comparisons test	Mean Diff.	99.9% CI of diff.	Significant?	Summary	Adjusted P Value
4 h
WT vs. M5A	-9.313e-10	-0.3733 to 0.3733	No	ns	> 0.9999
WT vs. M5C	0	-0.3733 to 0.3733	No	ns	> 0.9999
WT vs. GVD	-2.484e-09	-0.3733 to 0.3733	No	ns	> 0.9999
M5A vs. M5C	9.313e-10	-0.3733 to 0.3733	No	ns	> 0.9999
M5A vs. GVD	-1.552e-09	-0.3733 to 0.3733	No	ns	> 0.9999
M5C vs. GVD	-2.484e-09	-0.3733 to 0.3733	No	ns	> 0.9999
48 h
WT vs. M5A	0.7541	0.3808 to 1.127	Yes	****	< 0.0001
WT vs. M5C	0.1422	-0.2311 to 0.5155	No	ns	0.3835
WT vs. GVD	0.4138	0.04055 to 0.7871	Yes	***	0.0003
M5A vs. M5C	-0.6119	-0.9851 to -0.2386	Yes	****	< 0.0001
M5A vs. GVD	-0.3402	-0.7135 to 0.03304	No	**	0.0028
M5C vs. GVD	0.2716	-0.1017 to 0.6449	No	*	0.0207
72 h
WT vs. M5A	1.241	0.8676 to 1.614	Yes	****	< 0.0001
WT vs. M5C	0.5504	0.1771 to 0.9237	Yes	****	< 0.0001
WT vs. GVD	1.687	1.269 to 2.104	Yes	****	< 0.0001
M5A vs. M5C	-0.6905	-1.064 to -0.3172	Yes	****	< 0.0001
M5A vs. GVD	0.4458	0.02843 to 0.8631	Yes	***	0.0004
M5C vs. GVD	1.136	0.7189 to 1.554	Yes	****	< 0.0001
96 h
WT vs. M5A	1.179	0.8059 to 1.552	Yes	****	< 0.0001
WT vs. M5C	0.2019	-0.1713 to 0.5752	No	ns	0.1204
WT vs. GVD	1.771	1.398 to 2.145	Yes	****	< 0.0001
M5A vs. M5C	-0.9772	-1.351 to -0.6040	Yes	****	< 0.0001
M5A vs. GVD	0.5922	0.2189 to 0.9655	Yes	****	< 0.0001
M5C vs. GVD	1.569	1.196 to 1.943	Yes	****	< 0.0001
Test details	Mean 1	Mean 2	Mean Diff.	SE of diff.	N1	N2	q	DF
4 h
WT vs. M5A	0	9.313e-10	-9.313e-10	0.08788	3	3	1.499e-08	31
WT vs. M5C	0	0	0	0.08788	3	3	0	31
WT vs. GVD	0	2.484e-09	-2.484e-09	0.08788	3	3	3.997e-08	31
M5A vs. M5C	9.313e-10	0	9.313e-10	0.08788	3	3	1.499e-08	31
M5A vs. GVD	9.313e-10	2.484e-09	-1.552e-09	0.08788	3	3	2.498e-08	31
M5C vs. GVD	0	2.484e-09	-2.484e-09	0.08788	3	3	3.997e-08	31
48 h
WT vs. M5A	0.3981	-0.3559	0.7541	0.08788	3	3	12.14	31
WT vs. M5C	0.3981	0.2559	0.1422	0.08788	3	3	2.289	31
WT vs. GVD	0.3981	-0.01569	0.4138	0.08788	3	3	6.66	31
M5A vs. M5C	-0.3559	0.2559	-0.6119	0.08788	3	3	9.847	31
M5A vs. GVD	-0.3559	-0.01569	-0.3402	0.08788	3	3	5.476	31
M5C vs. GVD	0.2559	-0.01569	0.2716	0.08788	3	3	4.371	31
72 h
WT vs. M5A	1.206	-0.03522	1.241	0.08788	3	3	19.97	31
WT vs. M5C	1.206	0.6552	0.5504	0.08788	3	3	8.858	31
WT vs. GVD	1.206	-0.481	1.687	0.09825	3	2	24.28	31
M5A vs. M5C	-0.03522	0.6552	-0.6905	0.08788	3	3	11.11	31
M5A vs. GVD	-0.03522	-0.481	0.4458	0.09825	3	2	6.416	31
M5C vs. GVD	0.6552	-0.481	1.136	0.09825	3	2	16.36	31
96 h
WT vs. M5A	1.493	0.3134	1.179	0.08788	3	3	18.98	31
WT vs. M5C	1.493	1.291	0.2019	0.08788	3	3	3.25	31
WT vs. GVD	1.493	-0.2788	1.771	0.08788	3	3	28.51	31
M5A vs. M5C	0.3134	1.291	-0.9772	0.08788	3	3	15.73	31
M5A vs. GVD	0.3134	-0.2788	0.5922	0.08788	3	3	9.531	31
M5C vs. GVD	1.291	-0.2788	1.569	0.08788	3	3	25.26	31
