# Supplementary material for: Viral RNA switch mediates the dynamic control of flavivirus replicase recruitment by genome cyclization
Source: eLife. 2016 Oct 1;5:e17636. doi: 10.7554/eLife.17636 (PMC5101012; doi:10.7554/eLife.17636)
Supplement: Figure 5—source data 3. — DOI: http://dx.doi.org/10.7554/eLife.17636.017 [file elife-17636-fig5-data3.xlsx]

## Sheet: Figure 5F  source data
					Viral titer, log10(PFU/ml)
	WT	WT	WT	M1A	M1A	M1A	M1C	M1C	M1C
	R1	R2	R3	R1	R2	R3	R1	R2	R3
48 h	4.47712	4.82391	4.80163	3.52288	3.82391	3.52288	5.69897	5.60206	5.66901			Mean of vRNA copies at 4h post transfection
72 h	5.77815	6.12494	5.69897	4.22185	4.42597	4.30103	6.12494	5.75333	5.8451		WT	M1A	M1C
96 h	5.36798	5.47712	5.12494	4.36798	4.66901	5	5.8653	5.36798	5.42597		7.10142	7.17277	7.32637
					Normalized viral titer, log10(PFU/ml)
	WT	WT	WT	M1A	M1A	M1A	M1C	M1C	M1C
	R1	R2	R3	R1	R2	R3	R1	R2	R3
48 h	4.47712	4.82391	4.80163	3.45153	3.75256	3.45153	5.47401	5.3771	5.44405
72 h	5.77815	6.12494	5.69897	4.1505	4.35462	4.22968	5.89998	5.52837	5.62014
96 h	5.36798	5.47712	5.12494	4.29662	4.59765	4.92865	5.64034	5.14302	5.20101

## Sheet: ANOVA
Table Analyzed	Figure 5F
Two-way ANOVA	Ordinary
Alpha	0.05
Source of Variation	% of total variation	P value	P value summary	Significant?
Interaction	10.92	0.0003	***	Yes
Row Factor	16.82	< 0.0001	****	Yes
Column Factor	67.01	< 0.0001	****	Yes
ANOVA table	SS	DF	MS	F (DFn, DFd)	P value
Interaction	1.563	4	0.3908	F (4, 18) = 9.350	P = 0.0003
Row Factor	2.407	2	1.204	F (2, 18) = 28.80	P < 0.0001
Column Factor	9.59	2	4.795	F (2, 18) = 114.7	P < 0.0001
Residual	0.7523	18	0.04179
Number of missing values	0

## Sheet: Multiple comparisons
Within each row, compare columns (simple effects within rows)
Number of families	3
Number of comparisons per family	3
Alpha	0.001
Tukey's multiple comparisons test	Mean Diff.	99.9% CI of diff.	Significant?	Summary	Adjusted P Value
48 h
WT vs. M1A	1.149	0.4178 to 1.880	Yes	****	< 0.0001
WT vs. M1C	-0.7308	-1.462 to 0.0004065	No	**	0.001
M1A vs. M1C	-1.88	-2.611 to -1.149	Yes	****	< 0.0001
72 h
WT vs. M1A	1.622	0.8912 to 2.354	Yes	****	< 0.0001
WT vs. M1C	0.1845	-0.5467 to 0.9158	No	ns	0.523
M1A vs. M1C	-1.438	-2.169 to -0.7067	Yes	****	< 0.0001
96 h
WT vs. M1A	0.7157	-0.01554 to 1.447	No	**	0.0012
WT vs. M1C	-0.00478	-0.7360 to 0.7265	No	ns	0.9995
M1A vs. M1C	-0.7205	-1.452 to 0.01076	No	**	0.0012
Test details	Mean 1	Mean 2	Mean Diff.	SE of diff.	N1	N2	q	DF
48 h
WT vs. M1A	4.701	3.552	1.149	0.1669	3	3	9.735	18
WT vs. M1C	4.701	5.432	-0.7308	0.1669	3	3	6.192	18
M1A vs. M1C	3.552	5.432	-1.88	0.1669	3	3	15.93	18
72 h
WT vs. M1A	5.867	4.245	1.622	0.1669	3	3	13.75	18
WT vs. M1C	5.867	5.683	0.1845	0.1669	3	3	1.563	18
M1A vs. M1C	4.245	5.683	-1.438	0.1669	3	3	12.18	18
96 h
WT vs. M1A	5.323	4.608	0.7157	0.1669	3	3	6.064	18
WT vs. M1C	5.323	5.328	-0.00478	0.1669	3	3	0.0405	18
M1A vs. M1C	4.608	5.328	-0.7205	0.1669	3	3	6.104	18
