# Supplementary material for: Viral RNA switch mediates the dynamic control of flavivirus replicase recruitment by genome cyclization
Source: eLife. 2016 Oct 1;5:e17636. doi: 10.7554/eLife.17636 (PMC5101012; doi:10.7554/eLife.17636)
Supplement: Figure 5—source data 4. — DOI: http://dx.doi.org/10.7554/eLife.17636.018 [file elife-17636-fig5-data4.xlsx]

## Sheet: Figure 5G-I source data
									log10(vRNA copies per 2 ul sample)
	WT-GVD	WT-GVD	WT-GVD	M1A-GVD	M1A-GVD	M1A-GVD	M1C-GVD	M1C-GVD	M1C-GVD	M3A-GVD	M3A-GVD	M3A-GVD	M3C-GVD	M3C-GVD	M3C-GVD	M5A-GVD	M5A-GVD	M5A-GVD	M5C-GVD	M5C-GVD	M5C-GVD
time post transfection	R1	R2	R3	R1	R2	R3	R1	R2	R3	R1	R2	R3	R1	R2	R3	R1	R2	R3	R1	R2	R3
4 h	6.30555	6.17136	6.12067	6.28766	6.21311	6.21013	6.07892	6.25188	6.14154	6.12365	6.06997	6.21311	6.1654	6.42185	6.29661	6.38607	6.38905	6.35326	6.48149	6.60673	6.39203
24 h	6.14935	5.95721	6.20256	6.06067	5.92765	5.99564	6.18186	5.90696	5.9306	6.16413	5.88331	5.95425	5.89218	5.88035	5.90104	5.93947	6.03702	6.03406	5.78872	6.01337	5.79463
48 h	6.01287	5.91876	5.98251	5.87018	5.87625	5.90661	5.91876	5.99769	6.13128	5.7032	5.89447	5.83678	5.98858	5.7791	5.88232	6.10699	5.57265	5.83678	5.70624	5.58176	5.64552
72 h	5.75052	5.82281	5.6963	5.58787	5.63908	5.75956	5.71438	5.78968	5.82281	5.77462	5.70233	5.68727	5.67221	5.8198	5.62402	5.8198	5.7716	6.00955	5.67823	5.68727	5.16017
									log10(changes of vRNA copies relative to 4 h)
	WT-GVD	WT-GVD	WT-GVD	M1A-GVD	M1A-GVD	M1A-GVD	M1C-GVD	M1C-GVD	M1C-GVD	M3A-GVD	M3A-GVD	M3A-GVD	M3C-GVD	M3C-GVD	M3C-GVD	M5A-GVD	M5A-GVD	M5A-GVD	M5C-GVD	M5C-GVD	M5C-GVD
time post transfection	R1	R2	R3	R1	R2	R3	R1	R2	R3	R1	R2	R3	R1	R2	R3	R1	R2	R3	R1	R2	R3
4 h	0.106358	-0.027832	-0.078526	0.050694	-0.023856	-0.026838	-0.078526	0.09443	-0.015904	-0.011928	-0.065604	0.077532	-0.12922	0.127232	0.001988	0.00994	0.012922	-0.022862	-0.011928	0.113316	-0.101388
24 h	-0.049846	-0.241986	0.003362	-0.176298	-0.309318	-0.24133	0.024418	-0.25049	-0.226842	0.02855	-0.25227	-0.181326	-0.402442	-0.414266	-0.393574	-0.436654	-0.339106	-0.342062	-0.704702	-0.480046	-0.69879
48 h	-0.186322	-0.280438	-0.216682	-0.366786	-0.360714	-0.330354	-0.23869	-0.159754	-0.02617	-0.432378	-0.24111	-0.298794	-0.306034	-0.515518	-0.412294	-0.269138	-0.803474	-0.539342	-0.787182	-0.911658	-0.847902
72 h	-0.448674	-0.376386	-0.50289	-0.649094	-0.59789	-0.47741	-0.44307	-0.36777	-0.334638	-0.360962	-0.43325	-0.44831	-0.62241	-0.474822	-0.670602	-0.55633	-0.604522	-0.366574	-0.815186	-0.80615	-1.33325

## Sheet: ANOVA
Table Analyzed	Figure 5G,H,I
Two-way ANOVA	Ordinary
Alpha	0.05
Source of Variation	% of total variation	P value	P value summary	Significant?
Interaction	10.58	0.0014	**	Yes
Row Factor	52.68	< 0.0001	****	Yes
Column Factor	25.23	< 0.0001	****	Yes
ANOVA table	SS	DF	MS	F (DFn, DFd)	P value
Interaction	0.7025	18	0.03903	F (18, 56) = 2.860	P = 0.0014
Row Factor	3.498	3	1.166	F (3, 56) = 85.46	P < 0.0001
Column Factor	1.675	6	0.2792	F (6, 56) = 20.46	P < 0.0001
Residual	0.7641	56	0.01364
Number of missing values	0

## Sheet: Multiple comparisons
Within each row, compare columns (simple effects within rows)
Number of families	4
Number of comparisons per family	21
Alpha	0.001
Tukey's multiple comparisons test	Mean Diff.	99.9% CI of diff.	Significant?	Summary	Adjusted P Value
4 h
WT-GVD vs. M1A-GVD	6.209e-10	-0.4173 to 0.4173	No	ns	> 0.9999
WT-GVD vs. M1C-GVD	0	-0.4173 to 0.4173	No	ns	> 0.9999
WT-GVD vs. M3A-GVD	6.209e-10	-0.4173 to 0.4173	No	ns	> 0.9999
WT-GVD vs. M3C-GVD	-1.475e-09	-0.4173 to 0.4173	No	ns	> 0.9999
WT-GVD vs. M5A-GVD	6.209e-10	-0.4173 to 0.4173	No	ns	> 0.9999
WT-GVD vs. M5C-GVD	6.209e-10	-0.4173 to 0.4173	No	ns	> 0.9999
M1A-GVD vs. M1C-GVD	-6.209e-10	-0.4173 to 0.4173	No	ns	> 0.9999
M1A-GVD vs. M3A-GVD	0	-0.4173 to 0.4173	No	ns	> 0.9999
M1A-GVD vs. M3C-GVD	-2.095e-09	-0.4173 to 0.4173	No	ns	> 0.9999
M1A-GVD vs. M5A-GVD	0	-0.4173 to 0.4173	No	ns	> 0.9999
M1A-GVD vs. M5C-GVD	0	-0.4173 to 0.4173	No	ns	> 0.9999
M1C-GVD vs. M3A-GVD	6.209e-10	-0.4173 to 0.4173	No	ns	> 0.9999
M1C-GVD vs. M3C-GVD	-1.475e-09	-0.4173 to 0.4173	No	ns	> 0.9999
M1C-GVD vs. M5A-GVD	6.209e-10	-0.4173 to 0.4173	No	ns	> 0.9999
M1C-GVD vs. M5C-GVD	6.209e-10	-0.4173 to 0.4173	No	ns	> 0.9999
M3A-GVD vs. M3C-GVD	-2.095e-09	-0.4173 to 0.4173	No	ns	> 0.9999
M3A-GVD vs. M5A-GVD	0	-0.4173 to 0.4173	No	ns	> 0.9999
M3A-GVD vs. M5C-GVD	0	-0.4173 to 0.4173	No	ns	> 0.9999
M3C-GVD vs. M5A-GVD	2.095e-09	-0.4173 to 0.4173	No	ns	> 0.9999
M3C-GVD vs. M5C-GVD	2.095e-09	-0.4173 to 0.4173	No	ns	> 0.9999
M5A-GVD vs. M5C-GVD	0	-0.4173 to 0.4173	No	ns	> 0.9999
24 h
WT-GVD vs. M1A-GVD	0.1462	-0.2711 to 0.5634	No	ns	0.7243
WT-GVD vs. M1C-GVD	0.05481	-0.3624 to 0.4721	No	ns	0.9973
WT-GVD vs. M3A-GVD	0.03886	-0.3784 to 0.4561	No	ns	0.9996
WT-GVD vs. M3C-GVD	0.3073	-0.1100 to 0.7245	No	*	0.0327
WT-GVD vs. M5A-GVD	0.2765	-0.1408 to 0.6937	No	ns	0.0741
WT-GVD vs. M5C-GVD	0.5317	0.1144 to 0.9489	Yes	****	< 0.0001
M1A-GVD vs. M1C-GVD	-0.09134	-0.5086 to 0.3259	No	ns	0.9608
M1A-GVD vs. M3A-GVD	-0.1073	-0.5246 to 0.3100	No	ns	0.9177
M1A-GVD vs. M3C-GVD	0.1611	-0.2561 to 0.5784	No	ns	0.6259
M1A-GVD vs. M5A-GVD	0.1303	-0.2870 to 0.5475	No	ns	0.8171
M1A-GVD vs. M5C-GVD	0.3855	-0.03172 to 0.8028	No	**	0.0029
M1C-GVD vs. M3A-GVD	-0.01596	-0.4332 to 0.4013	No	ns	> 0.9999
M1C-GVD vs. M3C-GVD	0.2525	-0.1648 to 0.6697	No	ns	0.1317
M1C-GVD vs. M5A-GVD	0.2216	-0.1956 to 0.6389	No	ns	0.2512
M1C-GVD vs. M5C-GVD	0.4769	0.05962 to 0.8941	Yes	***	0.0001
M3A-GVD vs. M3C-GVD	0.2684	-0.1488 to 0.6857	No	ns	0.0905
M3A-GVD vs. M5A-GVD	0.2376	-0.1797 to 0.6548	No	ns	0.1823
M3A-GVD vs. M5C-GVD	0.4928	0.07558 to 0.9101	Yes	****	< 0.0001
M3C-GVD vs. M5A-GVD	-0.03082	-0.4481 to 0.3864	No	ns	0.9999
M3C-GVD vs. M5C-GVD	0.2244	-0.1928 to 0.6417	No	ns	0.2381
M5A-GVD vs. M5C-GVD	0.2552	-0.1620 to 0.6725	No	ns	0.1236
48 h
WT-GVD vs. M1A-GVD	0.1248	-0.2925 to 0.5421	No	ns	0.8451
WT-GVD vs. M1C-GVD	-0.08628	-0.5035 to 0.3310	No	ns	0.9703
WT-GVD vs. M3A-GVD	0.09628	-0.3210 to 0.5135	No	ns	0.9497
WT-GVD vs. M3C-GVD	0.1835	-0.2338 to 0.6007	No	ns	0.4738
WT-GVD vs. M5A-GVD	0.3095	-0.1078 to 0.7268	No	*	0.0307
WT-GVD vs. M5C-GVD	0.6211	0.2038 to 1.038	Yes	****	< 0.0001
M1A-GVD vs. M1C-GVD	-0.2111	-0.6283 to 0.2062	No	ns	0.3052
M1A-GVD vs. M3A-GVD	-0.02852	-0.4458 to 0.3887	No	ns	> 0.9999
M1A-GVD vs. M3C-GVD	0.05866	-0.3586 to 0.4759	No	ns	0.9961
M1A-GVD vs. M5A-GVD	0.1847	-0.2326 to 0.6020	No	ns	0.4656
M1A-GVD vs. M5C-GVD	0.4963	0.07904 to 0.9136	Yes	****	< 0.0001
M1C-GVD vs. M3A-GVD	0.1826	-0.2347 to 0.5998	No	ns	0.4799
M1C-GVD vs. M3C-GVD	0.2697	-0.1475 to 0.6870	No	ns	0.0876
M1C-GVD vs. M5A-GVD	0.3958	-0.02148 to 0.8130	No	**	0.0021
M1C-GVD vs. M5C-GVD	0.7074	0.2901 to 1.125	Yes	****	< 0.0001
M3A-GVD vs. M3C-GVD	0.08719	-0.3301 to 0.5044	No	ns	0.9688
M3A-GVD vs. M5A-GVD	0.2132	-0.2040 to 0.6305	No	ns	0.2937
M3A-GVD vs. M5C-GVD	0.5248	0.1076 to 0.9421	Yes	****	< 0.0001
M3C-GVD vs. M5A-GVD	0.126	-0.2912 to 0.5433	No	ns	0.839
M3C-GVD vs. M5C-GVD	0.4376	0.02038 to 0.8549	Yes	***	0.0005
M5A-GVD vs. M5C-GVD	0.3116	-0.1057 to 0.7289	No	*	0.0289
72 h
WT-GVD vs. M1A-GVD	0.1321	-0.2851 to 0.5494	No	ns	0.8071
WT-GVD vs. M1C-GVD	-0.06082	-0.4781 to 0.3564	No	ns	0.9952
WT-GVD vs. M3A-GVD	-0.02848	-0.4457 to 0.3888	No	ns	> 0.9999
WT-GVD vs. M3C-GVD	0.1466	-0.2706 to 0.5639	No	ns	0.7214
WT-GVD vs. M5A-GVD	0.06649	-0.3508 to 0.4837	No	ns	0.9922
WT-GVD vs. M5C-GVD	0.5422	0.1250 to 0.9595	Yes	****	< 0.0001
M1A-GVD vs. M1C-GVD	-0.193	-0.6102 to 0.2243	No	ns	0.412
M1A-GVD vs. M3A-GVD	-0.1606	-0.5779 to 0.2566	No	ns	0.6292
M1A-GVD vs. M3C-GVD	0.01448	-0.4028 to 0.4317	No	ns	> 0.9999
M1A-GVD vs. M5A-GVD	-0.06566	-0.4829 to 0.3516	No	ns	0.9928
M1A-GVD vs. M5C-GVD	0.4101	-0.007191 to 0.8273	No	**	0.0013
M1C-GVD vs. M3A-GVD	0.03235	-0.3849 to 0.4496	No	ns	0.9999
M1C-GVD vs. M3C-GVD	0.2075	-0.2098 to 0.6247	No	ns	0.3252
M1C-GVD vs. M5A-GVD	0.1273	-0.2899 to 0.5446	No	ns	0.8326
M1C-GVD vs. M5C-GVD	0.603	0.1858 to 1.020	Yes	****	< 0.0001
M3A-GVD vs. M3C-GVD	0.1751	-0.2422 to 0.5924	No	ns	0.5302
M3A-GVD vs. M5A-GVD	0.09497	-0.3223 to 0.5122	No	ns	0.9529
M3A-GVD vs. M5C-GVD	0.5707	0.1534 to 0.9879	Yes	****	< 0.0001
M3C-GVD vs. M5A-GVD	-0.08014	-0.4974 to 0.3371	No	ns	0.9795
M3C-GVD vs. M5C-GVD	0.3956	-0.02167 to 0.8128	No	**	0.0021
M5A-GVD vs. M5C-GVD	0.4757	0.05846 to 0.8930	Yes	***	0.0001
Test details	Mean 1	Mean 2	Mean Diff.	SE of diff.	N1	N2	q	DF
4 h
WT-GVD vs. M1A-GVD	6.209e-10	0	6.209e-10	0.09537	3	3	9.206e-09	56
WT-GVD vs. M1C-GVD	6.209e-10	6.209e-10	0	0.09537	3	3	0	56
WT-GVD vs. M3A-GVD	6.209e-10	0	6.209e-10	0.09537	3	3	9.206e-09	56
WT-GVD vs. M3C-GVD	6.209e-10	2.095e-09	-1.475e-09	0.09537	3	3	2.187e-08	56
WT-GVD vs. M5A-GVD	6.209e-10	0	6.209e-10	0.09537	3	3	9.206e-09	56
WT-GVD vs. M5C-GVD	6.209e-10	0	6.209e-10	0.09537	3	3	9.206e-09	56
M1A-GVD vs. M1C-GVD	0	6.209e-10	-6.209e-10	0.09537	3	3	9.206e-09	56
M1A-GVD vs. M3A-GVD	0	0	0	0.09537	3	3	0	56
M1A-GVD vs. M3C-GVD	0	2.095e-09	-2.095e-09	0.09537	3	3	3.107e-08	56
M1A-GVD vs. M5A-GVD	0	0	0	0.09537	3	3	0	56
M1A-GVD vs. M5C-GVD	0	0	0	0.09537	3	3	0	56
M1C-GVD vs. M3A-GVD	6.209e-10	0	6.209e-10	0.09537	3	3	9.206e-09	56
M1C-GVD vs. M3C-GVD	6.209e-10	2.095e-09	-1.475e-09	0.09537	3	3	2.187e-08	56
M1C-GVD vs. M5A-GVD	6.209e-10	0	6.209e-10	0.09537	3	3	9.206e-09	56
M1C-GVD vs. M5C-GVD	6.209e-10	0	6.209e-10	0.09537	3	3	9.206e-09	56
M3A-GVD vs. M3C-GVD	0	2.095e-09	-2.095e-09	0.09537	3	3	3.107e-08	56
M3A-GVD vs. M5A-GVD	0	0	0	0.09537	3	3	0	56
M3A-GVD vs. M5C-GVD	0	0	0	0.09537	3	3	0	56
M3C-GVD vs. M5A-GVD	2.095e-09	0	2.095e-09	0.09537	3	3	3.107e-08	56
M3C-GVD vs. M5C-GVD	2.095e-09	0	2.095e-09	0.09537	3	3	3.107e-08	56
M5A-GVD vs. M5C-GVD	0	0	0	0.09537	3	3	0	56
24 h
WT-GVD vs. M1A-GVD	-0.09616	-0.2423	0.1462	0.09537	3	3	2.167	56
WT-GVD vs. M1C-GVD	-0.09616	-0.151	0.05481	0.09537	3	3	0.8128	56
WT-GVD vs. M3A-GVD	-0.09616	-0.135	0.03886	0.09537	3	3	0.5762	56
WT-GVD vs. M3C-GVD	-0.09616	-0.4034	0.3073	0.09537	3	3	4.556	56
WT-GVD vs. M5A-GVD	-0.09616	-0.3726	0.2765	0.09537	3	3	4.099	56
WT-GVD vs. M5C-GVD	-0.09616	-0.6278	0.5317	0.09537	3	3	7.884	56
M1A-GVD vs. M1C-GVD	-0.2423	-0.151	-0.09134	0.09537	3	3	1.354	56
M1A-GVD vs. M3A-GVD	-0.2423	-0.135	-0.1073	0.09537	3	3	1.591	56
M1A-GVD vs. M3C-GVD	-0.2423	-0.4034	0.1611	0.09537	3	3	2.389	56
M1A-GVD vs. M5A-GVD	-0.2423	-0.3726	0.1303	0.09537	3	3	1.932	56
M1A-GVD vs. M5C-GVD	-0.2423	-0.6278	0.3855	0.09537	3	3	5.717	56
M1C-GVD vs. M3A-GVD	-0.151	-0.135	-0.01596	0.09537	3	3	0.2366	56
M1C-GVD vs. M3C-GVD	-0.151	-0.4034	0.2525	0.09537	3	3	3.743	56
M1C-GVD vs. M5A-GVD	-0.151	-0.3726	0.2216	0.09537	3	3	3.286	56
M1C-GVD vs. M5C-GVD	-0.151	-0.6278	0.4769	0.09537	3	3	7.071	56
M3A-GVD vs. M3C-GVD	-0.135	-0.4034	0.2684	0.09537	3	3	3.98	56
M3A-GVD vs. M5A-GVD	-0.135	-0.3726	0.2376	0.09537	3	3	3.523	56
M3A-GVD vs. M5C-GVD	-0.135	-0.6278	0.4928	0.09537	3	3	7.308	56
M3C-GVD vs. M5A-GVD	-0.4034	-0.3726	-0.03082	0.09537	3	3	0.457	56
M3C-GVD vs. M5C-GVD	-0.4034	-0.6278	0.2244	0.09537	3	3	3.328	56
M5A-GVD vs. M5C-GVD	-0.3726	-0.6278	0.2552	0.09537	3	3	3.785	56
48 h
WT-GVD vs. M1A-GVD	-0.2278	-0.3526	0.1248	0.09537	3	3	1.851	56
WT-GVD vs. M1C-GVD	-0.2278	-0.1415	-0.08628	0.09537	3	3	1.279	56
WT-GVD vs. M3A-GVD	-0.2278	-0.3241	0.09628	0.09537	3	3	1.428	56
WT-GVD vs. M3C-GVD	-0.2278	-0.4113	0.1835	0.09537	3	3	2.72	56
WT-GVD vs. M5A-GVD	-0.2278	-0.5373	0.3095	0.09537	3	3	4.589	56
WT-GVD vs. M5C-GVD	-0.2278	-0.8489	0.6211	0.09537	3	3	9.21	56
M1A-GVD vs. M1C-GVD	-0.3526	-0.1415	-0.2111	0.09537	3	3	3.13	56
M1A-GVD vs. M3A-GVD	-0.3526	-0.3241	-0.02852	0.09537	3	3	0.423	56
M1A-GVD vs. M3C-GVD	-0.3526	-0.4113	0.05866	0.09537	3	3	0.8699	56
M1A-GVD vs. M5A-GVD	-0.3526	-0.5373	0.1847	0.09537	3	3	2.739	56
M1A-GVD vs. M5C-GVD	-0.3526	-0.8489	0.4963	0.09537	3	3	7.359	56
M1C-GVD vs. M3A-GVD	-0.1415	-0.3241	0.1826	0.09537	3	3	2.707	56
M1C-GVD vs. M3C-GVD	-0.1415	-0.4113	0.2697	0.09537	3	3	4	56
M1C-GVD vs. M5A-GVD	-0.1415	-0.5373	0.3958	0.09537	3	3	5.869	56
M1C-GVD vs. M5C-GVD	-0.1415	-0.8489	0.7074	0.09537	3	3	10.49	56
M3A-GVD vs. M3C-GVD	-0.3241	-0.4113	0.08719	0.09537	3	3	1.293	56
M3A-GVD vs. M5A-GVD	-0.3241	-0.5373	0.2132	0.09537	3	3	3.162	56
M3A-GVD vs. M5C-GVD	-0.3241	-0.8489	0.5248	0.09537	3	3	7.782	56
M3C-GVD vs. M5A-GVD	-0.4113	-0.5373	0.126	0.09537	3	3	1.869	56
M3C-GVD vs. M5C-GVD	-0.4113	-0.8489	0.4376	0.09537	3	3	6.489	56
M5A-GVD vs. M5C-GVD	-0.5373	-0.8489	0.3116	0.09537	3	3	4.62	56
72 h
WT-GVD vs. M1A-GVD	-0.4427	-0.5748	0.1321	0.09537	3	3	1.959	56
WT-GVD vs. M1C-GVD	-0.4427	-0.3818	-0.06082	0.09537	3	3	0.9019	56
WT-GVD vs. M3A-GVD	-0.4427	-0.4142	-0.02848	0.09537	3	3	0.4222	56
WT-GVD vs. M3C-GVD	-0.4427	-0.5893	0.1466	0.09537	3	3	2.174	56
WT-GVD vs. M5A-GVD	-0.4427	-0.5091	0.06649	0.09537	3	3	0.9859	56
WT-GVD vs. M5C-GVD	-0.4427	-0.9849	0.5422	0.09537	3	3	8.04	56
M1A-GVD vs. M1C-GVD	-0.5748	-0.3818	-0.193	0.09537	3	3	2.861	56
M1A-GVD vs. M3A-GVD	-0.5748	-0.4142	-0.1606	0.09537	3	3	2.382	56
M1A-GVD vs. M3C-GVD	-0.5748	-0.5893	0.01448	0.09537	3	3	0.2147	56
M1A-GVD vs. M5A-GVD	-0.5748	-0.5091	-0.06566	0.09537	3	3	0.9735	56
M1A-GVD vs. M5C-GVD	-0.5748	-0.9849	0.4101	0.09537	3	3	6.08	56
M1C-GVD vs. M3A-GVD	-0.3818	-0.4142	0.03235	0.09537	3	3	0.4797	56
M1C-GVD vs. M3C-GVD	-0.3818	-0.5893	0.2075	0.09537	3	3	3.076	56
M1C-GVD vs. M5A-GVD	-0.3818	-0.5091	0.1273	0.09537	3	3	1.888	56
M1C-GVD vs. M5C-GVD	-0.3818	-0.9849	0.603	0.09537	3	3	8.942	56
M3A-GVD vs. M3C-GVD	-0.4142	-0.5893	0.1751	0.09537	3	3	2.596	56
M3A-GVD vs. M5A-GVD	-0.4142	-0.5091	0.09497	0.09537	3	3	1.408	56
M3A-GVD vs. M5C-GVD	-0.4142	-0.9849	0.5707	0.09537	3	3	8.462	56
M3C-GVD vs. M5A-GVD	-0.5893	-0.5091	-0.08014	0.09537	3	3	1.188	56
M3C-GVD vs. M5C-GVD	-0.5893	-0.9849	0.3956	0.09537	3	3	5.866	56
M5A-GVD vs. M5C-GVD	-0.5091	-0.9849	0.4757	0.09537	3	3	7.054	56
