# Supplementary material for: Viral RNA switch mediates the dynamic control of flavivirus replicase recruitment by genome cyclization
Source: eLife. 2016 Oct 1;5:e17636. doi: 10.7554/eLife.17636 (PMC5101012; doi:10.7554/eLife.17636)
Supplement: Figure 7—source data 1. — DOI: http://dx.doi.org/10.7554/eLife.17636.024 [file elife-17636-fig7-data1.xlsx]

## Sheet: Source data for Figure 7
	WT	GVD	L1D	L3D	M2A	M2B	M2C	M4A	M4B	M4C	M5A	M5B	M5C	M2C1	M2C2
	183176	158461	213575	186029	135611	144633	160153	250884	223431	223323	333140	261267	326651	251263	186626
Raw RLU, 6 h	186368	190017	272051	197223	189893	149086	231637	257514	248188	271469	315868	294989	366504	239427	177806
	208906	197950	203849	219016	157420	158246	202940	233843	213105	230372	350769	240980	342408	241893	220543
	WT	GVD	L1D	L3D	M2A	M2B	M2C	M4A	M4B	M4C	M5A	M5B	M5C	M2C1	M2C2
	166057552	183036	178071280	4309461	525315	119355	1086117	193586	183507	249852	363372	516805	78024512	136267984	113861128
Raw RLU, 72 h	145677760	141410	178993344	4262990	500383	120206	1165885	194258	196606	208936	355691	532083	79630800	137098272	96869424
	162281632	141711	162040160	3664704	468425	124213	831756	201809	188313	228411	350658	466291	75029448	138493952	111744568
	WT	GVD	L1D	L3D	M2A	M2B	M2C	M4A	M4B	M4C	M5A	M5B	M5C	M2C1	M2C2
	0.950001	0.869983	0.929294	0.926642	0.842437	0.960028	0.807861	1.01403	0.978924	0.923886	0.999643	0.983148	0.9463	1.02895	0.957097
Normalized RLU, 6 h	0.966555	1.04323	1.18373	0.982402	1.17965	0.989585	1.16845	1.04082	1.08739	1.12307	0.947815	1.11004	1.06175	0.980477	0.911865
	1.08344	1.08679	0.886975	1.09096	0.977918	1.05039	1.02369	0.94515	0.933683	0.953048	1.05254	0.906808	0.991947	0.990576	1.13104
	WT	GVD	L1D	L3D	M2A	M2B	M2C	M4A	M4B	M4C	M5A	M5B	M5C	M2C1	M2C2
	861.22	1.0049	774.812	21.4662	3.26334	0.792241	5.47871	0.782439	0.804004	1.03364	1.09036	1.94474	226.035	558.031	583.928
Normalized RLU, 72 h	755.525	0.776369	778.825	21.2347	3.10846	0.797889	5.88108	0.785155	0.861395	0.864367	1.06731	2.00223	230.688	561.431	496.788
	841.637	0.778022	705.059	18.2545	2.90993	0.824486	4.19563	0.815674	0.825061	0.944935	1.05221	1.75465	217.358	567.146	573.074
	WT	GVD	L1D	L3D	M2A	M2B	M2C	M4A	M4B	M4C	M5A	M5B	M5C	M2C1	M2C2
	105.096	0.12263	94.5515	2.61955	0.39823	0.0966782	0.668575	0.0954823	0.0981133	0.126137	0.133058	0.237319	27.5834	68.0974	71.2576
Replication efficiency relative to WT	92.1978	0.0947416	95.0411	2.5913	0.37933	0.0973677	0.717677	0.095813	0.105118	0.10548	0.130245	0.244335	28.1513	68.5123	60.6237
	102.706	0.0949429	86.0394	2.22763	0.355103	0.100614	0.511999	0.0995374	0.100683	0.115312	0.128403	0.214123	26.5246	69.2097	69.933

## Sheet: ANOVA-Fig.7
Table Analyzed	Figure 7
ANOVA summary
F	593.306
P value	< 0.0001
P value summary	****
Are differences among means statistically significant? (P < 0.05)	Yes
R square	0.996401
Brown-Forsythe test
F (DFn, DFd)	1.257261 (14, 30)
P value	0.289
P value summary	ns
Significantly different standard deviations? (P < 0.05)	No
Bartlett's test
Bartlett's statistic (corrected)
P value
P value summary
Significantly different standard deviations? (P < 0.05)
ANOVA table	SS	DF	MS	F (DFn, DFd)	P value
Treatment (between columns)	59442.9	14	4245.92	F (14, 30) = 593.3060	P < 0.0001
Residual (within columns)	214.691	30	7.15638
Total	59657.6	44
Model comparison	SS	DF	Probability it is correct
Null H. All population means identical	59657.6	44	0
Alternative H: Distinct population means	214.691	30	1
Ratio of probabilities			0
Difference in AICc			206.08
Data summary
Number of treatments (columns)	15
Number of values (total)	45

## Sheet: Mutliple comparisons-Fig.7
Number of families	1
Number of comparisons per family	105
Alpha	0.001
Tukey's multiple comparisons test	Mean Diff.	99.9% CI of diff.	Significant?	Summary	Adjusted P Value
GVD vs. WT	-99.8959	-111.2870 to -88.50483	Yes	****	< 0.0001
L1D vs. WT	-8.12265	-19.51372 to 3.268419	No	*	0.0462
L3D vs. WT	-97.5205	-108.9116 to -86.12944	Yes	****	< 0.0001
M2A vs. WT	-99.6225	-111.0135 to -88.23138	Yes	****	< 0.0001
M2B vs. WT	-99.9018	-111.2929 to -88.51071	Yes	****	< 0.0001
M2C vs. WT	-99.3672	-110.7583 to -87.97618	Yes	****	< 0.0001
M4A vs. WT	-99.9031	-111.2941 to -88.51199	Yes	****	< 0.0001
M4B vs. WT	-99.8987	-111.2898 to -88.50763	Yes	****	< 0.0001
M4C vs. WT	-99.8844	-111.2754 to -88.49329	Yes	****	< 0.0001
M5A vs. WT	-99.8694	-111.2605 to -88.47836	Yes	****	< 0.0001
M5B vs. WT	-99.7681	-111.1591 to -88.37701	Yes	****	< 0.0001
M5C vs. WT	-72.5803	-83.97133 to -61.18919	Yes	****	< 0.0001
M2C1 vs. WT	-31.3936	-42.78462 to -20.00248	Yes	****	< 0.0001
M2C2 vs. WT	-32.7285	-44.11961 to -21.33747	Yes	****	< 0.0001
L1D vs. GVD	91.7733	80.38218 to 103.1643	Yes	****	< 0.0001
L3D vs. GVD	2.37539	-9.015682 to 13.76646	No	ns	0.9982
M2A vs. GVD	0.27345	-11.11762 to 11.66452	No	ns	> 0.9999
M2B vs. GVD	-0.00588477	-11.39695 to 11.38518	No	ns	> 0.9999
M2C vs. GVD	0.528646	-10.86242 to 11.91971	No	ns	> 0.9999
M4A vs. GVD	-0.00716043	-11.39823 to 11.38391	No	ns	> 0.9999
M4B vs. GVD	-0.00279983	-11.39387 to 11.38827	No	ns	> 0.9999
M4C vs. GVD	0.0115385	-11.37953 to 11.40261	No	ns	> 0.9999
M5A vs. GVD	0.0264642	-11.36460 to 11.41753	No	ns	> 0.9999
M5B vs. GVD	0.127821	-11.26325 to 11.51889	No	ns	> 0.9999
M5C vs. GVD	27.3156	15.92457 to 38.70670	Yes	****	< 0.0001
M2C1 vs. GVD	68.5024	57.11128 to 79.89342	Yes	****	< 0.0001
M2C2 vs. GVD	67.1674	55.77629 to 78.55843	Yes	****	< 0.0001
L3D vs. L1D	-89.3979	-100.7889 to -78.00679	Yes	****	< 0.0001
M2A vs. L1D	-91.4998	-102.8909 to -80.10873	Yes	****	< 0.0001
M2B vs. L1D	-91.7791	-103.1702 to -80.38806	Yes	****	< 0.0001
M2C vs. L1D	-91.2446	-102.6357 to -79.85353	Yes	****	< 0.0001
M4A vs. L1D	-91.7804	-103.1715 to -80.38934	Yes	****	< 0.0001
M4B vs. L1D	-91.776	-103.1671 to -80.38498	Yes	****	< 0.0001
M4C vs. L1D	-91.7617	-103.1528 to -80.37064	Yes	****	< 0.0001
M5A vs. L1D	-91.7468	-103.1379 to -80.35571	Yes	****	< 0.0001
M5B vs. L1D	-91.6454	-103.0365 to -80.25436	Yes	****	< 0.0001
M5C vs. L1D	-64.4576	-75.84868 to -53.06654	Yes	****	< 0.0001
M2C1 vs. L1D	-23.2709	-34.66197 to -11.87983	Yes	****	< 0.0001
M2C2 vs. L1D	-24.6059	-35.99696 to -13.21482	Yes	****	< 0.0001
M2A vs. L3D	-2.10194	-13.49301 to 9.289132	No	ns	0.9995
M2B vs. L3D	-2.38127	-13.77234 to 9.009797	No	ns	0.9982
M2C vs. L3D	-1.84674	-13.23781 to 9.544328	No	ns	0.9999
M4A vs. L3D	-2.38255	-13.77362 to 9.008521	No	ns	0.9982
M4B vs. L3D	-2.37819	-13.76926 to 9.012882	No	ns	0.9982
M4C vs. L3D	-2.36385	-13.75492 to 9.027221	No	ns	0.9983
M5A vs. L3D	-2.34892	-13.73999 to 9.042146	No	ns	0.9984
M5B vs. L3D	-2.24757	-13.63863 to 9.143503	No	ns	0.999
M5C vs. L3D	24.9402	13.54918 to 36.33132	Yes	****	< 0.0001
M2C1 vs. L3D	66.127	54.73589 to 77.51803	Yes	****	< 0.0001
M2C2 vs. L3D	64.792	53.40090 to 76.18304	Yes	****	< 0.0001
M2B vs. M2A	-0.279335	-11.67040 to 11.11173	No	ns	> 0.9999
M2C vs. M2A	0.255196	-11.13587 to 11.64627	No	ns	> 0.9999
M4A vs. M2A	-0.28061	-11.67168 to 11.11046	No	ns	> 0.9999
M4B vs. M2A	-0.27625	-11.66732 to 11.11482	No	ns	> 0.9999
M4C vs. M2A	-0.261911	-11.65298 to 11.12916	No	ns	> 0.9999
M5A vs. M2A	-0.246986	-11.63805 to 11.14408	No	ns	> 0.9999
M5B vs. M2A	-0.145629	-11.53670 to 11.24544	No	ns	> 0.9999
M5C vs. M2A	27.0422	15.65112 to 38.43325	Yes	****	< 0.0001
M2C1 vs. M2A	68.2289	56.83783 to 79.61996	Yes	****	< 0.0001
M2C2 vs. M2A	66.8939	55.50284 to 78.28497	Yes	****	< 0.0001
M2C vs. M2B	0.534531	-10.85654 to 11.92560	No	ns	> 0.9999
M4A vs. M2B	-0.00127567	-11.39234 to 11.38979	No	ns	> 0.9999
M4B vs. M2B	0.00308494	-11.38798 to 11.39415	No	ns	> 0.9999
M4C vs. M2B	0.0174232	-11.37365 to 11.40849	No	ns	> 0.9999
M5A vs. M2B	0.0323489	-11.35872 to 11.42342	No	ns	> 0.9999
M5B vs. M2B	0.133706	-11.25736 to 11.52477	No	ns	> 0.9999
M5C vs. M2B	27.3215	15.93045 to 38.71259	Yes	****	< 0.0001
M2C1 vs. M2B	68.5082	57.11716 to 79.89930	Yes	****	< 0.0001
M2C2 vs. M2B	67.1732	55.78217 to 78.56431	Yes	****	< 0.0001
M4A vs. M2C	-0.535806	-11.92688 to 10.85526	No	ns	> 0.9999
M4B vs. M2C	-0.531446	-11.92251 to 10.85962	No	ns	> 0.9999
M4C vs. M2C	-0.517107	-11.90818 to 10.87396	No	ns	> 0.9999
M5A vs. M2C	-0.502182	-11.89325 to 10.88889	No	ns	> 0.9999
M5B vs. M2C	-0.400825	-11.79189 to 10.99024	No	ns	> 0.9999
M5C vs. M2C	26.787	15.39592 to 38.17806	Yes	****	< 0.0001
M2C1 vs. M2C	67.9737	56.58263 to 79.36477	Yes	****	< 0.0001
M2C2 vs. M2C	66.6387	55.24764 to 78.02978	Yes	****	< 0.0001
M4B vs. M4A	0.0043606	-11.38671 to 11.39543	No	ns	> 0.9999
M4C vs. M4A	0.0186989	-11.37237 to 11.40977	No	ns	> 0.9999
M5A vs. M4A	0.0336246	-11.35744 to 11.42469	No	ns	> 0.9999
M5B vs. M4A	0.134982	-11.25609 to 11.52605	No	ns	> 0.9999
M5C vs. M4A	27.3228	15.93173 to 38.71386	Yes	****	< 0.0001
M2C1 vs. M4A	68.5095	57.11844 to 79.90057	Yes	****	< 0.0001
M2C2 vs. M4A	67.1745	55.78345 to 78.56558	Yes	****	< 0.0001
M4C vs. M4B	0.0143383	-11.37673 to 11.40541	No	ns	> 0.9999
M5A vs. M4B	0.029264	-11.36180 to 11.42033	No	ns	> 0.9999
M5B vs. M4B	0.130621	-11.26045 to 11.52169	No	ns	> 0.9999
M5C vs. M4B	27.3184	15.92737 to 38.70950	Yes	****	< 0.0001
M2C1 vs. M4B	68.5052	57.11408 to 79.89622	Yes	****	< 0.0001
M2C2 vs. M4B	67.1702	55.77909 to 78.56123	Yes	****	< 0.0001
M5A vs. M4C	0.0149257	-11.37614 to 11.40599	No	ns	> 0.9999
M5B vs. M4C	0.116283	-11.27479 to 11.50735	No	ns	> 0.9999
M5C vs. M4C	27.3041	15.91303 to 38.69516	Yes	****	< 0.0001
M2C1 vs. M4C	68.4908	57.09974 to 79.88188	Yes	****	< 0.0001
M2C2 vs. M4C	67.1558	55.76475 to 78.54689	Yes	****	< 0.0001
M5B vs. M5A	0.101357	-11.28971 to 11.49243	No	ns	> 0.9999
M5C vs. M5A	27.2892	15.89810 to 38.68024	Yes	****	< 0.0001
M2C1 vs. M5A	68.4759	57.08482 to 79.86695	Yes	****	< 0.0001
M2C2 vs. M5A	67.1409	55.74982 to 78.53196	Yes	****	< 0.0001
M5C vs. M5B	27.1878	15.79674 to 38.57888	Yes	****	< 0.0001
M2C1 vs. M5B	68.3745	56.98346 to 79.76559	Yes	****	< 0.0001
M2C2 vs. M5B	67.0395	55.64847 to 78.43060	Yes	****	< 0.0001
M2C1 vs. M5C	41.1867	29.79564 to 52.57778	Yes	****	< 0.0001
M2C2 vs. M5C	39.8517	28.46065 to 51.24279	Yes	****	< 0.0001
M2C2 vs. M2C1	-1.33499	-12.72606 to 10.05608	No	ns	> 0.9999
Test details	Mean 1	Mean 2	Mean Diff.	SE of diff.	n1	n2	q	DF
GVD vs. WT	0.104105	100	-99.8959	2.18424	3	3	64.6788	30
L1D vs. WT	91.8774	100	-8.12265	2.18424	3	3	5.25911	30
L3D vs. WT	2.47949	100	-97.5205	2.18424	3	3	63.1408	30
M2A vs. WT	0.377555	100	-99.6225	2.18424	3	3	64.5018	30
M2B vs. WT	0.0982199	100	-99.9018	2.18424	3	3	64.6826	30
M2C vs. WT	0.63275	100	-99.3672	2.18424	3	3	64.3365	30
M4A vs. WT	0.0969442	100	-99.9031	2.18424	3	3	64.6834	30
M4B vs. WT	0.101305	100	-99.8987	2.18424	3	3	64.6806	30
M4C vs. WT	0.115643	100	-99.8844	2.18424	3	3	64.6713	30
M5A vs. WT	0.130569	100	-99.8694	2.18424	3	3	64.6617	30
M5B vs. WT	0.231926	100	-99.7681	2.18424	3	3	64.5961	30
M5C vs. WT	27.4197	100	-72.5803	2.18424	3	3	46.993	30
M2C1 vs. WT	68.6064	100	-31.3936	2.18424	3	3	20.3261	30
M2C2 vs. WT	67.2715	100	-32.7285	2.18424	3	3	21.1905	30
L1D vs. GVD	91.8774	0.104105	91.7733	2.18424	3	3	59.4197	30
L3D vs. GVD	2.47949	0.104105	2.37539	2.18424	3	3	1.53797	30
M2A vs. GVD	0.377555	0.104105	0.27345	2.18424	3	3	0.177048	30
M2B vs. GVD	0.0982199	0.104105	-0.00588477	2.18424	3	3	0.00381016	30
M2C vs. GVD	0.63275	0.104105	0.528646	2.18424	3	3	0.342278	30
M4A vs. GVD	0.0969442	0.104105	-0.00716043	2.18424	3	3	0.00463611	30
M4B vs. GVD	0.101305	0.104105	-0.00279983	2.18424	3	3	0.00181278	30
M4C vs. GVD	0.115643	0.104105	0.0115385	2.18424	3	3	0.00747072	30
M5A vs. GVD	0.130569	0.104105	0.0264642	2.18424	3	3	0.0171345	30
M5B vs. GVD	0.231926	0.104105	0.127821	2.18424	3	3	0.0827593	30
M5C vs. GVD	27.4197	0.104105	27.3156	2.18424	3	3	17.6858	30
M2C1 vs. GVD	68.6064	0.104105	68.5024	2.18424	3	3	44.3527	30
M2C2 vs. GVD	67.2715	0.104105	67.1674	2.18424	3	3	43.4883	30
L3D vs. L1D	2.47949	91.8774	-89.3979	2.18424	3	3	57.8817	30
M2A vs. L1D	0.377555	91.8774	-91.4998	2.18424	3	3	59.2426	30
M2B vs. L1D	0.0982199	91.8774	-91.7791	2.18424	3	3	59.4235	30
M2C vs. L1D	0.63275	91.8774	-91.2446	2.18424	3	3	59.0774	30
M4A vs. L1D	0.0969442	91.8774	-91.7804	2.18424	3	3	59.4243	30
M4B vs. L1D	0.101305	91.8774	-91.776	2.18424	3	3	59.4215	30
M4C vs. L1D	0.115643	91.8774	-91.7617	2.18424	3	3	59.4122	30
M5A vs. L1D	0.130569	91.8774	-91.7468	2.18424	3	3	59.4026	30
M5B vs. L1D	0.231926	91.8774	-91.6454	2.18424	3	3	59.3369	30
M5C vs. L1D	27.4197	91.8774	-64.4576	2.18424	3	3	41.7339	30
M2C1 vs. L1D	68.6064	91.8774	-23.2709	2.18424	3	3	15.067	30
M2C2 vs. L1D	67.2715	91.8774	-24.6059	2.18424	3	3	15.9314	30
M2A vs. L3D	0.377555	2.47949	-2.10194	2.18424	3	3	1.36092	30
M2B vs. L3D	0.0982199	2.47949	-2.38127	2.18424	3	3	1.54178	30
M2C vs. L3D	0.63275	2.47949	-1.84674	2.18424	3	3	1.19569	30
M4A vs. L3D	0.0969442	2.47949	-2.38255	2.18424	3	3	1.54261	30
M4B vs. L3D	0.101305	2.47949	-2.37819	2.18424	3	3	1.53979	30
M4C vs. L3D	0.115643	2.47949	-2.36385	2.18424	3	3	1.5305	30
M5A vs. L3D	0.130569	2.47949	-2.34892	2.18424	3	3	1.52084	30
M5B vs. L3D	0.231926	2.47949	-2.24757	2.18424	3	3	1.45521	30
M5C vs. L3D	27.4197	2.47949	24.9402	2.18424	3	3	16.1479	30
M2C1 vs. L3D	68.6064	2.47949	66.127	2.18424	3	3	42.8147	30
M2C2 vs. L3D	67.2715	2.47949	64.792	2.18424	3	3	41.9503	30
M2B vs. M2A	0.0982199	0.377555	-0.279335	2.18424	3	3	0.180859	30
M2C vs. M2A	0.63275	0.377555	0.255196	2.18424	3	3	0.16523	30
M4A vs. M2A	0.0969442	0.377555	-0.28061	2.18424	3	3	0.181684	30
M4B vs. M2A	0.101305	0.377555	-0.27625	2.18424	3	3	0.178861	30
M4C vs. M2A	0.115643	0.377555	-0.261911	2.18424	3	3	0.169578	30
M5A vs. M2A	0.130569	0.377555	-0.246986	2.18424	3	3	0.159914	30
M5B vs. M2A	0.231926	0.377555	-0.145629	2.18424	3	3	0.0942891	30
M5C vs. M2A	27.4197	0.377555	27.0422	2.18424	3	3	17.5088	30
M2C1 vs. M2A	68.6064	0.377555	68.2289	2.18424	3	3	44.1756	30
M2C2 vs. M2A	67.2715	0.377555	66.8939	2.18424	3	3	43.3113	30
M2C vs. M2B	0.63275	0.0982199	0.534531	2.18424	3	3	0.346088	30
M4A vs. M2B	0.0969442	0.0982199	-0.00127567	2.18424	3	3	0.000825945	30
M4B vs. M2B	0.101305	0.0982199	0.00308494	2.18424	3	3	0.00199738	30
M4C vs. M2B	0.115643	0.0982199	0.0174232	2.18424	3	3	0.0112809	30
M5A vs. M2B	0.130569	0.0982199	0.0323489	2.18424	3	3	0.0209447	30
M5B vs. M2B	0.231926	0.0982199	0.133706	2.18424	3	3	0.0865695	30
M5C vs. M2B	27.4197	0.0982199	27.3215	2.18424	3	3	17.6897	30
M2C1 vs. M2B	68.6064	0.0982199	68.5082	2.18424	3	3	44.3565	30
M2C2 vs. M2B	67.2715	0.0982199	67.1732	2.18424	3	3	43.4921	30
M4A vs. M2C	0.0969442	0.63275	-0.535806	2.18424	3	3	0.346914	30
M4B vs. M2C	0.101305	0.63275	-0.531446	2.18424	3	3	0.344091	30
M4C vs. M2C	0.115643	0.63275	-0.517107	2.18424	3	3	0.334807	30
M5A vs. M2C	0.130569	0.63275	-0.502182	2.18424	3	3	0.325143	30
M5B vs. M2C	0.231926	0.63275	-0.400825	2.18424	3	3	0.259519	30
M5C vs. M2C	27.4197	0.63275	26.787	2.18424	3	3	17.3436	30
M2C1 vs. M2C	68.6064	0.63275	67.9737	2.18424	3	3	44.0104	30
M2C2 vs. M2C	67.2715	0.63275	66.6387	2.18424	3	3	43.146	30
M4B vs. M4A	0.101305	0.0969442	0.0043606	2.18424	3	3	0.00282332	30
M4C vs. M4A	0.115643	0.0969442	0.0186989	2.18424	3	3	0.0121068	30
M5A vs. M4A	0.130569	0.0969442	0.0336246	2.18424	3	3	0.0217706	30
M5B vs. M4A	0.231926	0.0969442	0.134982	2.18424	3	3	0.0873954	30
M5C vs. M4A	27.4197	0.0969442	27.3228	2.18424	3	3	17.6905	30
M2C1 vs. M4A	68.6064	0.0969442	68.5095	2.18424	3	3	44.3573	30
M2C2 vs. M4A	67.2715	0.0969442	67.1745	2.18424	3	3	43.493	30
M4C vs. M4B	0.115643	0.101305	0.0143383	2.18424	3	3	0.0092835	30
M5A vs. M4B	0.130569	0.101305	0.029264	2.18424	3	3	0.0189473	30
M5B vs. M4B	0.231926	0.101305	0.130621	2.18424	3	3	0.0845721	30
M5C vs. M4B	27.4197	0.101305	27.3184	2.18424	3	3	17.6877	30
M2C1 vs. M4B	68.6064	0.101305	68.5052	2.18424	3	3	44.3545	30
M2C2 vs. M4B	67.2715	0.101305	67.1702	2.18424	3	3	43.4901	30
M5A vs. M4C	0.130569	0.115643	0.0149257	2.18424	3	3	0.00966382	30
M5B vs. M4C	0.231926	0.115643	0.116283	2.18424	3	3	0.0752886	30
M5C vs. M4C	27.4197	0.115643	27.3041	2.18424	3	3	17.6784	30
M2C1 vs. M4C	68.6064	0.115643	68.4908	2.18424	3	3	44.3452	30
M2C2 vs. M4C	67.2715	0.115643	67.1558	2.18424	3	3	43.4808	30
M5B vs. M5A	0.231926	0.130569	0.101357	2.18424	3	3	0.0656247	30
M5C vs. M5A	27.4197	0.130569	27.2892	2.18424	3	3	17.6687	30
M2C1 vs. M5A	68.6064	0.130569	68.4759	2.18424	3	3	44.3355	30
M2C2 vs. M5A	67.2715	0.130569	67.1409	2.18424	3	3	43.4712	30
M5C vs. M5B	27.4197	0.231926	27.1878	2.18424	3	3	17.6031	30
M2C1 vs. M5B	68.6064	0.231926	68.3745	2.18424	3	3	44.2699	30
M2C2 vs. M5B	67.2715	0.231926	67.0395	2.18424	3	3	43.4056	30
M2C1 vs. M5C	68.6064	27.4197	41.1867	2.18424	3	3	26.6668	30
M2C2 vs. M5C	67.2715	27.4197	39.8517	2.18424	3	3	25.8025	30
M2C2 vs. M2C1	67.2715	68.6064	-1.33499	2.18424	3	3	0.864356	30

## Sheet: Descriptive statistics-Fig.7
	WT	GVD	L1D	L3D	M2A	M2B	M2C	M4A	M4B	M4C	M5A	M5B	M5C	M2C1	M2C2
Number of values	3	3	3	3	3	3	3	3	3	3	3	3	3	3	3
Minimum	92.1978	0.0947416	86.0394	2.22763	0.355103	0.0966782	0.511999	0.0954823	0.0981133	0.10548	0.128403	0.214123	26.5246	68.0974	60.6237
25% Percentile	92.1978	0.0947416	86.0394	2.22763	0.355103	0.0966782	0.511999	0.0954823	0.0981133	0.10548	0.128403	0.214123	26.5246	68.0974	60.6237
Median	102.706	0.0949429	94.5515	2.5913	0.37933	0.0973677	0.668575	0.095813	0.100683	0.115312	0.130245	0.237319	27.5834	68.5123	69.933
75% Percentile	105.096	0.12263	95.0411	2.61955	0.39823	0.100614	0.717677	0.0995374	0.105118	0.126137	0.133058	0.244335	28.1513	69.2097	71.2576
Maximum	105.096	0.12263	95.0411	2.61955	0.39823	0.100614	0.717677	0.0995374	0.105118	0.126137	0.133058	0.244335	28.1513	69.2097	71.2576
Mean	100	0.104105	91.8774	2.47949	0.377555	0.0982199	0.63275	0.0969442	0.101305	0.115643	0.130569	0.231926	27.4197	68.6064	67.2715
Std. Deviation	6.86173	0.0160433	5.06174	0.218578	0.0216184	0.00210165	0.107417	0.00225183	0.00354342	0.0103321	0.00234454	0.015812	0.825596	0.562143	5.79508
Std. Error of Mean	3.96162	0.0092626	2.9224	0.126196	0.0124814	0.00121339	0.0620173	0.0013001	0.0020458	0.00596522	0.00135362	0.00912905	0.476658	0.324554	3.34579
Lower 95% CI	82.9546	0.0642511	79.3033	1.93651	0.323852	0.0929991	0.365913	0.0913504	0.0925025	0.0899769	0.124745	0.192647	25.3688	67.21	52.8757
Upper 95% CI	117.045	0.143958	104.451	3.02247	0.431257	0.103441	0.899588	0.102538	0.110107	0.141309	0.136393	0.271205	29.4706	70.0029	81.6672

## Sheet: Source data for Fig.7S1
	WT	GVD	L1D	L2D	L3D	G77A	A79G	77AGA	77AAG	77GUC	77CCA	A98G	97AGA	97CCA
Raw RLU, 6 h	449765	481097	460887	511103	588510	639475	516668	567321	453810	423192	378098	566916	613776	566983
	463553	555829	594171	578737	650677	640578	585890	593791	498303	491250	564506	621622	614812	697980
	WT	GVD	L1D	L2D	L3D	G77A	A79G	77AGA	77AAG	77GUC	77CCA	A98G	97AGA	97CCA
Raw RLU, 72 h	147229472	261360	136771040	149497056	4705591	145617392	107815688	173813200	112061488	46701912	34635016	134571360	75631744	31803444
	167954416	216916	161627920	157960672	5025545	115230880	101556936	217315824	103551008	42368232	34727296	155296336	86205600	40100484
	WT	GVD	L1D	L2D	L3D	G77A	A79G	77AGA	77AAG	77GUC	77CCA	A98G	97AGA	97CCA
Normalized RLU, 6 h	0.984903	0.927929	0.873671	0.937941	0.949832	0.999138	0.937217	0.977203	0.953269	0.925574	0.802241	0.953972	0.999157	0.896442
	1.0151	1.07207	1.12633	1.06206	1.05017	1.00086	1.06278	1.0228	1.04673	1.07443	1.19776	1.04603	1.00084	1.10356
	WT	GVD	L1D	L2D	L3D	G77A	A79G	77AGA	77AAG	77GUC	77CCA	A98G	97AGA	97CCA
Normalized RLU, 72 h	322.406	0.504105	259.267	274.347	7.59464	227.518	195.574	299.391	235.395	102.143	73.4879	226.449	123.12	50.2836
	367.79	0.418383	306.387	289.879	8.11104	180.041	184.221	374.324	217.518	92.6647	73.6837	261.323	140.333	63.4018
	WT	GVD	L1D	L2D	L3D	G77A	A79G	77AGA	77AAG	77GUC	77CCA	A98G	97AGA	97CCA
Replication efficiency relative to WT	93.4245	0.146076	75.1287	79.4983	2.20072	65.9285	56.672	86.7554	68.2112	29.5983	21.2948	65.6187	35.6768	14.5708
	106.576	0.121236	88.7826	83.999	2.35036	52.171	53.3822	108.469	63.0309	26.8517	21.3516	75.7245	40.6647	18.3721

## Sheet: One-way ANOVA for Fig.7S1
Table Analyzed	Figure 7-figure supplement 1
ANOVA summary
F	52.22
P value	< 0.0001
P value summary	****
Are differences among means statistically significant? (P < 0.05)	Yes
R square	0.9798
Brown-Forsythe test
F (DFn, DFd)	+infinity (13, 14)
P value	< 0.0001
P value summary	****
Significantly different standard deviations? (P < 0.05)	Yes
Bartlett's test
Bartlett's statistic (corrected)
P value
P value summary
Significantly different standard deviations? (P < 0.05)
ANOVA table	SS	DF	MS	F (DFn, DFd)	P value
Treatment (between columns)	29751	13	2289	F (13, 14) = 52.22	P < 0.0001
Residual (within columns)	613.5	14	43.82
Total	30365	27
Data summary
Number of treatments (columns)	14
Number of values (total)	28

## Sheet: multiple comparisons-Fig.7S1
Number of families	1
Number of comparisons per family	91
Alpha	0.05
Tukey's multiple comparisons test	Mean Diff.	95% CI of diff.	Significant?	Summary	Adjusted P Value
WT vs. GVD	99.87	73.48 to 126.3	Yes	****	< 0.0001
WT vs. L1D	18.04	-8.343 to 44.43	No	ns	0.3533
WT vs. L2D	18.25	-8.136 to 44.64	No	ns	0.3391
WT vs. L3D	97.72	71.34 to 124.1	Yes	****	< 0.0001
WT vs. G77A	40.95	14.56 to 67.34	Yes	**	0.0012
WT vs. A79G	44.97	18.59 to 71.36	Yes	***	0.0005
WT vs. 77AGA	2.388	-24.00 to 28.77	No	ns	> 0.9999
WT vs. 77AAG	34.38	7.992 to 60.77	Yes	**	0.0063
WT vs. 77GUC	71.78	45.39 to 98.16	Yes	****	< 0.0001
WT vs. 77CCA	78.68	52.29 to 105.1	Yes	****	< 0.0001
WT vs. A98G	29.33	2.942 to 55.72	Yes	*	0.0234
WT vs. 97AGA	61.83	35.44 to 88.22	Yes	****	< 0.0001
WT vs. 97CCA	83.53	57.14 to 109.9	Yes	****	< 0.0001
GVD vs. L1D	-81.82	-108.2 to -55.44	Yes	****	< 0.0001
GVD vs. L2D	-81.62	-108.0 to -55.23	Yes	****	< 0.0001
GVD vs. L3D	-2.142	-28.53 to 24.25	No	ns	> 0.9999
GVD vs. G77A	-58.92	-85.30 to -32.53	Yes	****	< 0.0001
GVD vs. A79G	-54.89	-81.28 to -28.51	Yes	****	< 0.0001
GVD vs. 77AGA	-97.48	-123.9 to -71.09	Yes	****	< 0.0001
GVD vs. 77AAG	-65.49	-91.87 to -39.10	Yes	****	< 0.0001
GVD vs. 77GUC	-28.09	-54.48 to -1.704	Yes	*	0.0322
GVD vs. 77CCA	-21.19	-47.58 to 5.197	No	ns	0.1796
GVD vs. A98G	-70.54	-96.92 to -44.15	Yes	****	< 0.0001
GVD vs. 97AGA	-38.04	-64.42 to -11.65	Yes	**	0.0025
GVD vs. 97CCA	-16.34	-42.72 to 10.05	No	ns	0.4835
L1D vs. L2D	0.207	-26.18 to 26.59	No	ns	> 0.9999
L1D vs. L3D	79.68	53.29 to 106.1	Yes	****	< 0.0001
L1D vs. G77A	22.91	-3.481 to 49.29	No	ns	0.1196
L1D vs. A79G	26.93	0.5417 to 53.32	Yes	*	0.0435
L1D vs. 77AGA	-15.66	-42.04 to 10.73	No	ns	0.5407
L1D vs. 77AAG	16.33	-10.05 to 42.72	No	ns	0.4838
L1D vs. 77GUC	53.73	27.34 to 80.12	Yes	****	< 0.0001
L1D vs. 77CCA	60.63	34.25 to 87.02	Yes	****	< 0.0001
L1D vs. A98G	11.28	-15.10 to 37.67	No	ns	0.8838
L1D vs. 97AGA	43.78	17.40 to 70.17	Yes	***	0.0006
L1D vs. 97CCA	65.48	39.10 to 91.87	Yes	****	< 0.0001
L2D vs. L3D	79.47	53.09 to 105.9	Yes	****	< 0.0001
L2D vs. G77A	22.7	-3.688 to 49.09	No	ns	0.1257
L2D vs. A79G	26.72	0.3347 to 53.11	Yes	*	0.0459
L2D vs. 77AGA	-15.86	-42.25 to 10.52	No	ns	0.5231
L2D vs. 77AAG	16.13	-10.26 to 42.51	No	ns	0.5009
L2D vs. 77GUC	53.52	27.14 to 79.91	Yes	****	< 0.0001
L2D vs. 77CCA	60.43	34.04 to 86.81	Yes	****	< 0.0001
L2D vs. A98G	11.08	-15.31 to 37.46	No	ns	0.8953
L2D vs. 97AGA	43.58	17.19 to 69.96	Yes	***	0.0006
L2D vs. 97CCA	65.28	38.89 to 91.66	Yes	****	< 0.0001
L3D vs. G77A	-56.77	-83.16 to -30.39	Yes	****	< 0.0001
L3D vs. A79G	-52.75	-79.14 to -26.36	Yes	****	< 0.0001
L3D vs. 77AGA	-95.34	-121.7 to -68.95	Yes	****	< 0.0001
L3D vs. 77AAG	-63.35	-89.73 to -36.96	Yes	****	< 0.0001
L3D vs. 77GUC	-25.95	-52.34 to 0.4375	No	ns	0.0559
L3D vs. 77CCA	-19.05	-45.43 to 7.339	No	ns	0.2881
L3D vs. A98G	-68.4	-94.78 to -42.01	Yes	****	< 0.0001
L3D vs. 97AGA	-35.9	-62.28 to -9.508	Yes	**	0.0043
L3D vs. 97CCA	-14.2	-40.58 to 12.19	No	ns	0.6669
G77A vs. A79G	4.023	-22.36 to 30.41	No	ns	> 0.9999
G77A vs. 77AGA	-38.56	-64.95 to -12.18	Yes	**	0.0022
G77A vs. 77AAG	-6.571	-32.96 to 19.82	No	ns	0.9981
G77A vs. 77GUC	30.82	4.438 to 57.21	Yes	*	0.0158
G77A vs. 77CCA	37.73	11.34 to 64.11	Yes	**	0.0027
G77A vs. A98G	-11.62	-38.01 to 14.77	No	ns	0.8637
G77A vs. 97AGA	20.88	-5.508 to 47.27	No	ns	0.1929
G77A vs. 97CCA	42.58	16.19 to 68.97	Yes	***	0.0008
A79G vs. 77AGA	-42.59	-68.97 to -16.20	Yes	***	0.0008
A79G vs. 77AAG	-10.59	-36.98 to 15.79	No	ns	0.9193
A79G vs. 77GUC	26.8	0.4152 to 53.19	Yes	*	0.0449
A79G vs. 77CCA	33.7	7.317 to 60.09	Yes	**	0.0075
A79G vs. A98G	-15.64	-42.03 to 10.74	No	ns	0.5417
A79G vs. 97AGA	16.86	-9.531 to 43.24	No	ns	0.4417
A79G vs. 97CCA	38.56	12.17 to 64.94	Yes	**	0.0022
77AGA vs. 77AAG	31.99	5.604 to 58.38	Yes	*	0.0117
77AGA vs. 77GUC	69.39	43.00 to 95.77	Yes	****	< 0.0001
77AGA vs. 77CCA	76.29	49.90 to 102.7	Yes	****	< 0.0001
77AGA vs. A98G	26.94	0.5537 to 53.33	Yes	*	0.0434
77AGA vs. 97AGA	59.44	33.05 to 85.83	Yes	****	< 0.0001
77AGA vs. 97CCA	81.14	54.75 to 107.5	Yes	****	< 0.0001
77AAG vs. 77GUC	37.4	11.01 to 63.78	Yes	**	0.0029
77AAG vs. 77CCA	44.3	17.91 to 70.68	Yes	***	0.0005
77AAG vs. A98G	-5.05	-31.44 to 21.34	No	ns	0.9999
77AAG vs. 97AGA	27.45	1.063 to 53.84	Yes	*	0.038
77AAG vs. 97CCA	49.15	22.76 to 75.54	Yes	***	0.0002
77GUC vs. 77CCA	6.902	-19.49 to 33.29	No	ns	0.9969
77GUC vs. A98G	-42.45	-68.83 to -16.06	Yes	***	0.0008
77GUC vs. 97AGA	-9.946	-36.33 to 16.44	No	ns	0.9458
77GUC vs. 97CCA	11.75	-14.63 to 38.14	No	ns	0.8555
77CCA vs. A98G	-49.35	-75.74 to -22.96	Yes	***	0.0002
77CCA vs. 97AGA	-16.85	-43.23 to 9.539	No	ns	0.4424
77CCA vs. 97CCA	4.852	-21.54 to 31.24	No	ns	> 0.9999
A98G vs. 97AGA	32.5	6.114 to 58.89	Yes	*	0.0102
A98G vs. 97CCA	54.2	27.81 to 80.59	Yes	****	< 0.0001
97AGA vs. 97CCA	21.7	-4.688 to 48.09	No	ns	0.1595
Test details	Mean 1	Mean 2	Mean Diff.	SE of diff.	n1	n2	q	DF
WT vs. GVD	100	0.1337	99.87	6.62	2	2	21.33	14
WT vs. L1D	100	81.96	18.04	6.62	2	2	3.855	14
WT vs. L2D	100	81.75	18.25	6.62	2	2	3.899	14
WT vs. L3D	100	2.276	97.72	6.62	2	2	20.88	14
WT vs. G77A	100	59.05	40.95	6.62	2	2	8.748	14
WT vs. A79G	100	55.03	44.97	6.62	2	2	9.608	14
WT vs. 77AGA	100	97.61	2.388	6.62	2	2	0.5101	14
WT vs. 77AAG	100	65.62	34.38	6.62	2	2	7.344	14
WT vs. 77GUC	100	28.23	71.78	6.62	2	2	15.33	14
WT vs. 77CCA	100	21.32	78.68	6.62	2	2	16.81	14
WT vs. A98G	100	70.67	29.33	6.62	2	2	6.265	14
WT vs. 97AGA	100	38.17	61.83	6.62	2	2	13.21	14
WT vs. 97CCA	100	16.47	83.53	6.62	2	2	17.84	14
GVD vs. L1D	0.1337	81.96	-81.82	6.62	2	2	17.48	14
GVD vs. L2D	0.1337	81.75	-81.62	6.62	2	2	17.44	14
GVD vs. L3D	0.1337	2.276	-2.142	6.62	2	2	0.4576	14
GVD vs. G77A	0.1337	59.05	-58.92	6.62	2	2	12.59	14
GVD vs. A79G	0.1337	55.03	-54.89	6.62	2	2	11.73	14
GVD vs. 77AGA	0.1337	97.61	-97.48	6.62	2	2	20.82	14
GVD vs. 77AAG	0.1337	65.62	-65.49	6.62	2	2	13.99	14
GVD vs. 77GUC	0.1337	28.23	-28.09	6.62	2	2	6.001	14
GVD vs. 77CCA	0.1337	21.32	-21.19	6.62	2	2	4.527	14
GVD vs. A98G	0.1337	70.67	-70.54	6.62	2	2	15.07	14
GVD vs. 97AGA	0.1337	38.17	-38.04	6.62	2	2	8.126	14
GVD vs. 97CCA	0.1337	16.47	-16.34	6.62	2	2	3.49	14
L1D vs. L2D	81.96	81.75	0.207	6.62	2	2	0.04422	14
L1D vs. L3D	81.96	2.276	79.68	6.62	2	2	17.02	14
L1D vs. G77A	81.96	59.05	22.91	6.62	2	2	4.893	14
L1D vs. A79G	81.96	55.03	26.93	6.62	2	2	5.753	14
L1D vs. 77AGA	81.96	97.61	-15.66	6.62	2	2	3.345	14
L1D vs. 77AAG	81.96	65.62	16.33	6.62	2	2	3.49	14
L1D vs. 77GUC	81.96	28.23	53.73	6.62	2	2	11.48	14
L1D vs. 77CCA	81.96	21.32	60.63	6.62	2	2	12.95	14
L1D vs. A98G	81.96	70.67	11.28	6.62	2	2	2.411	14
L1D vs. 97AGA	81.96	38.17	43.78	6.62	2	2	9.354	14
L1D vs. 97CCA	81.96	16.47	65.48	6.62	2	2	13.99	14
L2D vs. L3D	81.75	2.276	79.47	6.62	2	2	16.98	14
L2D vs. G77A	81.75	59.05	22.7	6.62	2	2	4.849	14
L2D vs. A79G	81.75	55.03	26.72	6.62	2	2	5.709	14
L2D vs. 77AGA	81.75	97.61	-15.86	6.62	2	2	3.389	14
L2D vs. 77AAG	81.75	65.62	16.13	6.62	2	2	3.445	14
L2D vs. 77GUC	81.75	28.23	53.52	6.62	2	2	11.43	14
L2D vs. 77CCA	81.75	21.32	60.43	6.62	2	2	12.91	14
L2D vs. A98G	81.75	70.67	11.08	6.62	2	2	2.366	14
L2D vs. 97AGA	81.75	38.17	43.58	6.62	2	2	9.31	14
L2D vs. 97CCA	81.75	16.47	65.28	6.62	2	2	13.95	14
L3D vs. G77A	2.276	59.05	-56.77	6.62	2	2	12.13	14
L3D vs. A79G	2.276	55.03	-52.75	6.62	2	2	11.27	14
L3D vs. 77AGA	2.276	97.61	-95.34	6.62	2	2	20.37	14
L3D vs. 77AAG	2.276	65.62	-63.35	6.62	2	2	13.53	14
L3D vs. 77GUC	2.276	28.23	-25.95	6.62	2	2	5.544	14
L3D vs. 77CCA	2.276	21.32	-19.05	6.62	2	2	4.069	14
L3D vs. A98G	2.276	70.67	-68.4	6.62	2	2	14.61	14
L3D vs. 97AGA	2.276	38.17	-35.9	6.62	2	2	7.668	14
L3D vs. 97CCA	2.276	16.47	-14.2	6.62	2	2	3.033	14
G77A vs. A79G	59.05	55.03	4.023	6.62	2	2	0.8594	14
G77A vs. 77AGA	59.05	97.61	-38.56	6.62	2	2	8.238	14
G77A vs. 77AAG	59.05	65.62	-6.571	6.62	2	2	1.404	14
G77A vs. 77GUC	59.05	28.23	30.82	6.62	2	2	6.585	14
G77A vs. 77CCA	59.05	21.32	37.73	6.62	2	2	8.059	14
G77A vs. A98G	59.05	70.67	-11.62	6.62	2	2	2.483	14
G77A vs. 97AGA	59.05	38.17	20.88	6.62	2	2	4.46	14
G77A vs. 97CCA	59.05	16.47	42.58	6.62	2	2	9.096	14
A79G vs. 77AGA	55.03	97.61	-42.59	6.62	2	2	9.097	14
A79G vs. 77AAG	55.03	65.62	-10.59	6.62	2	2	2.263	14
A79G vs. 77GUC	55.03	28.23	26.8	6.62	2	2	5.726	14
A79G vs. 77CCA	55.03	21.32	33.7	6.62	2	2	7.2	14
A79G vs. A98G	55.03	70.67	-15.64	6.62	2	2	3.342	14
A79G vs. 97AGA	55.03	38.17	16.86	6.62	2	2	3.601	14
A79G vs. 97CCA	55.03	16.47	38.56	6.62	2	2	8.237	14
77AGA vs. 77AAG	97.61	65.62	31.99	6.62	2	2	6.834	14
77AGA vs. 77GUC	97.61	28.23	69.39	6.62	2	2	14.82	14
77AGA vs. 77CCA	97.61	21.32	76.29	6.62	2	2	16.3	14
77AGA vs. A98G	97.61	70.67	26.94	6.62	2	2	5.755	14
77AGA vs. 97AGA	97.61	38.17	59.44	6.62	2	2	12.7	14
77AGA vs. 97CCA	97.61	16.47	81.14	6.62	2	2	17.33	14
77AAG vs. 77GUC	65.62	28.23	37.4	6.62	2	2	7.989	14
77AAG vs. 77CCA	65.62	21.32	44.3	6.62	2	2	9.463	14
77AAG vs. A98G	65.62	70.67	-5.05	6.62	2	2	1.079	14
77AAG vs. 97AGA	65.62	38.17	27.45	6.62	2	2	5.864	14
77AAG vs. 97CCA	65.62	16.47	49.15	6.62	2	2	10.5	14
77GUC vs. 77CCA	28.23	21.32	6.902	6.62	2	2	1.474	14
77GUC vs. A98G	28.23	70.67	-42.45	6.62	2	2	9.068	14
77GUC vs. 97AGA	28.23	38.17	-9.946	6.62	2	2	2.125	14
77GUC vs. 97CCA	28.23	16.47	11.75	6.62	2	2	2.511	14
77CCA vs. A98G	21.32	70.67	-49.35	6.62	2	2	10.54	14
77CCA vs. 97AGA	21.32	38.17	-16.85	6.62	2	2	3.599	14
77CCA vs. 97CCA	21.32	16.47	4.852	6.62	2	2	1.036	14
A98G vs. 97AGA	70.67	38.17	32.5	6.62	2	2	6.943	14
A98G vs. 97CCA	70.67	16.47	54.2	6.62	2	2	11.58	14
97AGA vs. 97CCA	38.17	16.47	21.7	6.62	2	2	4.636	14
