# Supplementary material for: Viral RNA switch mediates the dynamic control of flavivirus replicase recruitment by genome cyclization
Source: eLife journal article supplement (doi:10.7554/elife.17636), 2016-10-01
Supplement: supp [file elife_poa_e17636_Figure_3_source_data_1.xlsx]

## Sheet: Source data for Figure 3B
			p4-cHPstop-SP-IRES-Rluc-Rep						p4-Dualstop-SP-IRES-Rluc-Rep
Time points post transfection (h)	6	24	48	72	96		6	24	48	72	96
Raw RLU	920454	1533810	12150672	121824704	153391120		750041	1181148	14441739	172618144	187195344
	955002	1360768	11806028	113179992	154375264		1017029	1398869	10348522	132540072	219536272
	839197	1406868	12721472	126558648	159376480		748395	1860517	13011275	157133024	199995120
Normalized RLU	1.01721	1.69503	13.4279	134.63	169.515		0.894516	1.40866	17.2235	205.868	223.253
	1.05539	1.5038	13.047	125.077	170.602		1.21293	1.66832	12.3419	158.07	261.824
	0.927408	1.55475	14.0587	139.862	176.129		0.892553	2.21889	15.5175	187.4	238.519
Mean of Normalized RLU	1	1.58453	13.5112	133.19	172.082		1	1.76529	15.0277	183.78	241.199
SD of Normalized RLU	0.0657009	0.0990326	0.510954	7.49701	3.54686		0.184407	0.413728	2.47743	24.1038	19.4244

## Sheet: paired t-test for Figure 3B
Table Analyzed	Data 1
Column B	p4-Dualstop-SP-IRES-Rluc-Rep
vs.	vs.
Column A	p4-cHPstop-SP-IRES-Rluc-Rep
Paired t test
P value	0.1766
P value summary	ns
Significantly different? (P < 0.05)	No
One- or two-tailed P value?	Two-tailed
t, df	t=1.639 df=4
Number of pairs	5
How big is the difference?
Mean of differences	24.28
SD of differences	33.13
SEM of differences	14.82
95% confidence interval	-16.86 to 65.42
R squared	0.4017
How effective was the pairing?
Correlation coefficient (r)	0.9999
P value (one tailed)	< 0.0001
P value summary	****
Was the pairing significantly effective?	Yes

## Sheet: Source data for Figure 3D
	WT	M1A	M1B	M1C	M3A	M3B	M3C
	908852	975550	966843	1252538	1340714	1035633	1119023
Raw RLU, 6 h	933229	896033	1297705	1405311	1310643	1011412	1071932
	911383	1140133	973721	1324246	1253346	922236	996905
	WT	M1A	M1B	M1C	M3A	M3B	M3C
	41165108	2321800	3568377	34038196	296606	241107	8363175
Raw RLU, 72 h	37026032	1319717	4497305	37225800	297313	253442	10278149
	34068396	1503234	3443565	42948568	391537	245373	6563268
	WT	M1A	M1B	M1C	M3A	M3B	M3C
	0.990228	0.971755	0.895704	0.943627	1.03008	1.04635	1.05308
Normalized RLU, 6 h	1.01679	0.892547	1.20222	1.05872	1.00697	1.02188	1.00876
	0.992985	1.1357	0.902075	0.99765	0.962951	0.931777	0.938158
	WT	M1A	M1B	M1C	M3A	M3B	M3C
	44.8509	2.31277	3.30582	25.6434	0.227884	0.243601	7.87033
Normalized RLU, 72 h	40.3412	1.31458	4.1664	28.0449	0.228427	0.256064	9.67246
	37.1188	1.49739	3.19019	32.3563	0.30082	0.247912	6.1765
	WT	M1A	M1B	M1C	M3A	M3B	M3C
	110.009	5.67268	8.1084	62.8973	0.558936	0.597494	19.3041
Replication efficiency, relative to WT	98.9476	3.22436	10.2192	68.7876	0.560285	0.628055	23.7243
	91.0437	3.67275	7.82479	79.3623	0.737841	0.608065	15.1495

## Sheet: One-way ANOVA for Figure 3D
Table Analyzed	Figure 3D
ANOVA summary
F	182.171
P value	< 0.0001
P value summary	****
Are differences among means statistically significant? (P < 0.05)	Yes
R square	0.987353
Brown-Forsythe test
F (DFn, DFd)	2.094683 (6, 14)
P value	0.1193
P value summary	ns
Significantly different standard deviations? (P < 0.05)	No
Bartlett's test
Bartlett's statistic (corrected)
P value
P value summary
Significantly different standard deviations? (P < 0.05)
ANOVA table	SS	DF	MS	F (DFn, DFd)		P value
Treatment (between columns)	28443.8	6	4740.63	F(6, 14) = 182.1706		P < 0.0001
Residual (within columns)	364.322	14	26.023
Total	28808.1	20
Model comparison	SS	DF	Probability it is correct
Null H. All population means identical	28808.1	20	0
Alternative H: Distinct population means	364.322	14	1
Ratio of probabilities			0
Difference in AICc			68.4445
Data summary
Number of treatments (columns)	7
Number of values (total)	21

## Sheet: multiple comparisons-Figure 3D
Number of families	1
Number of comparisons per family	21
Alpha	0.001
Tukey's multiple comparisons test	Mean Diff.	99.9% CI of diff.	Significant?	Summary	Adjusted P Value
M1A vs. WT	-95.8101	-119.1188 to -72.50137	Yes	****	< 0.0001
M1B vs. WT	-91.2825	-114.5912 to -67.97384	Yes	****	< 0.0001
M1C vs. WT	-29.6509	-52.95962 to -6.342224	Yes	****	< 0.0001
M3A vs. WT	-99.381	-122.6897 to -76.07228	Yes	****	< 0.0001
M3B vs. WT	-99.3888	-122.6975 to -76.08010	Yes	****	< 0.0001
M3C vs. WT	-80.6074	-103.9161 to -57.29868	Yes	****	< 0.0001
M1B vs. M1A	4.52754	-18.78116 to 27.83624	No	ns	0.922
M1C vs. M1A	66.1591	42.85045 to 89.46785	Yes	****	< 0.0001
M3A vs. M1A	-3.57091	-26.87961 to 19.73779	No	ns	0.9735
M3B vs. M1A	-3.57872	-26.88742 to 19.72997	No	ns	0.9732
M3C vs. M1A	15.2027	-8.106004 to 38.51139	No	*	0.0328
M1C vs. M1B	61.6316	38.32291 to 84.94032	Yes	****	< 0.0001
M3A vs. M1B	-8.09845	-31.40714 to 15.21025	No	ns	0.4859
M3B vs. M1B	-8.10626	-31.41496 to 15.20244	No	ns	0.4848
M3C vs. M1B	10.6752	-12.63354 to 33.98386	No	ns	0.2094
M3A vs. M1C	-69.7301	-93.03876 to -46.42136	Yes	****	< 0.0001
M3B vs. M1C	-69.7379	-93.04658 to -46.42918	Yes	****	< 0.0001
M3C vs. M1C	-50.9565	-74.26515 to -27.64776	Yes	****	< 0.0001
M3B vs. M3A	-0.00781615	-23.31651 to 23.30088	No	ns	> 0.9999
M3C vs. M3A	18.7736	-4.535095 to 42.08230	No	**	0.0069
M3C vs. M3B	18.7814	-4.527279 to 42.09012	No	**	0.0069
Test details	Mean 1	Mean 2	Mean Diff.	SE of diff.	n1	n2	q	DF
M1A vs. WT	4.18993	100	-95.8101	4.16517	3	3	32.5307	14
M1B vs. WT	8.71747	100	-91.2825	4.16517	3	3	30.9934	14
M1C vs. WT	70.3491	100	-29.6509	4.16517	3	3	10.0675	14
M3A vs. WT	0.619021	100	-99.381	4.16517	3	3	33.7431	14
M3B vs. WT	0.611205	100	-99.3888	4.16517	3	3	33.7458	14
M3C vs. WT	19.3926	100	-80.6074	4.16517	3	3	27.3688	14
M1B vs. M1A	8.71747	4.18993	4.52754	4.16517	3	3	1.53725	14
M1C vs. M1A	70.3491	4.18993	66.1591	4.16517	3	3	22.4632	14
M3A vs. M1A	0.619021	4.18993	-3.57091	4.16517	3	3	1.21244	14
M3B vs. M1A	0.611205	4.18993	-3.57872	4.16517	3	3	1.21509	14
M3C vs. M1A	19.3926	4.18993	15.2027	4.16517	3	3	5.16181	14
M1C vs. M1B	70.3491	8.71747	61.6316	4.16517	3	3	20.926	14
M3A vs. M1B	0.619021	8.71747	-8.09845	4.16517	3	3	2.74969	14
M3B vs. M1B	0.611205	8.71747	-8.10626	4.16517	3	3	2.75234	14
M3C vs. M1B	19.3926	8.71747	10.6752	4.16517	3	3	3.62457	14
M3A vs. M1C	0.619021	70.3491	-69.7301	4.16517	3	3	23.6756	14
M3B vs. M1C	0.611205	70.3491	-69.7379	4.16517	3	3	23.6783	14
M3C vs. M1C	19.3926	70.3491	-50.9565	4.16517	3	3	17.3014	14
M3B vs. M3A	0.611205	0.619021	-0.00781615	4.16517	3	3	0.00265384	14
M3C vs. M3A	19.3926	0.619021	18.7736	4.16517	3	3	6.37425	14
M3C vs. M3B	19.3926	0.611205	18.7814	4.16517	3	3	6.37691	14

## Sheet: Source data&ANOVA-Fig.3S1
	WT	AUU	GAU	AGU	ACG
	908852	992332	1016261	865056	793825
Raw RLU, 6 h	933229	978337	1015353	1033692	799017
	911383	1006716	891257	1058224	787619
	WT	AUU	GAU	AGU	ACG
	49103556	26970042	2097687	1351122	16224746
Raw RLU, 48 h	54916884	21483204	1853744	1422807	19170990
	53320868	26888872	2098500	1506362	15570882
	WT	AUU	GAU	AGU	ACG
	0.990228	0.999869	1.04308	0.877644	1.00043
Normalized RLU, 6 h	1.01679	0.985768	1.04215	1.04873	1.00697
	0.992985	1.01436	0.914776	1.07362	0.992605
	WT	AUU	GAU	AGU	ACG
	53.5001	27.1749	2.15304	1.37078	20.4474		0.57143	0.57143	0.57143	0.57143	0.57143
Normalized RLU, 48 h	59.834	21.6464	1.90266	1.44351	24.1604		0.57143	0.57143	0.57143	0.57143	0.57143
	58.095	27.0931	2.15388	1.52828	19.6234		0.57143	0.57143	0.57143	0.57143	0.57143
	WT	AUU	GAU	AGU	ACG
	93.6249	47.5559	3.76781	2.39886	35.7828
Replication efficiency, relative to WT	104.709	37.881	3.32965	2.52614	42.2806
	101.666	47.4128	3.76927	2.67448	34.3408
One-way ANOVA
Table Analyzed	Figure 3-figure supplement 1
ANOVA summary
F	290.9
P value	< 0.0001
P value summary	****
Are differences among means statistically significant? (P < 0.05)	Yes
R square	0.9915
Brown-Forsythe test
F (DFn, DFd)	0.7663 (4, 10)
P value	0.5708
P value summary	ns
Significantly different standard deviations? (P < 0.05)	No
Bartlett's test
Bartlett's statistic (corrected)
P value
P value summary
Significantly different standard deviations? (P < 0.05)
ANOVA table	SS	DF	MS	F (DFn, DFd)	P value
Treatment (between columns)	18968	4	4742	F (4, 10) = 290.9	P < 0.0001
Residual (within columns)	163	10	16.3
Total	19131	14
Data summary
Number of treatments (columns)	5
Number of values (total)	15

## Sheet: multiple comparisons-Fig.3S1
Number of families	1
Number of comparisons per family	10
Alpha	0.05
Tukey's multiple comparisons test	Mean Diff.	95% CI of diff.	Significant?	Summary	Adjusted P Value
WT vs. AUU	55.72	44.87 to 66.57	Yes	****	< 0.0001
WT vs. GAU	96.38	85.53 to 107.2	Yes	****	< 0.0001
WT vs. AGU	97.47	86.62 to 108.3	Yes	****	< 0.0001
WT vs. ACG	62.53	51.68 to 73.38	Yes	****	< 0.0001
AUU vs. GAU	40.66	29.81 to 51.51	Yes	****	< 0.0001
AUU vs. AGU	41.75	30.90 to 52.60	Yes	****	< 0.0001
AUU vs. ACG	6.815	-4.035 to 17.67	No	ns	0.304
GAU vs. AGU	1.089	-9.761 to 11.94	No	ns	0.997
GAU vs. ACG	-33.85	-44.70 to -23.00	Yes	****	< 0.0001
AGU vs. ACG	-34.93	-45.78 to -24.08	Yes	****	< 0.0001
Test details	Mean 1	Mean 2	Mean Diff.	SE of diff.	n1	n2	q	DF
WT vs. AUU	100	44.28	55.72	3.297	3	3	23.9	10
WT vs. GAU	100	3.622	96.38	3.297	3	3	41.34	10
WT vs. AGU	100	2.533	97.47	3.297	3	3	41.81	10
WT vs. ACG	100	37.47	62.53	3.297	3	3	26.82	10
AUU vs. GAU	44.28	3.622	40.66	3.297	3	3	17.44	10
AUU vs. AGU	44.28	2.533	41.75	3.297	3	3	17.91	10
AUU vs. ACG	44.28	37.47	6.815	3.297	3	3	2.923	10
GAU vs. AGU	3.622	2.533	1.089	3.297	3	3	0.4672	10
GAU vs. ACG	3.622	37.47	-33.85	3.297	3	3	14.52	10
AGU vs. ACG	2.533	37.47	-34.93	3.297	3	3	14.99	10
